# Supplementary material for: Comparative transcriptome and proteome analysis reveals a global impact of the nitrogen regulators AreA and AreB on secondary metabolism in Fusarium fujikuroi
Source: PLoS One. 2017 Apr 25;12(4):e0176194. doi: 10.1371/journal.pone.0176194 (PMC5404775; doi:10.1371/journal.pone.0176194)
Supplement: S4 Table — (XLSX) [file pone.0176194.s004.xlsx]

## Sheet: a) Transcription Factors
S4a Table Differentially regulated genes encoding predicted Transcription Factors in wild type, ∆AREA and ∆AREB cultivated under limiting (6 mM GLN) and sufficient (60 mM GLN) nitrogen conditions.
Differential expression (Gene Expression Data) is depicted by log2 fold changes.
AreA regulated?' indicates if differential expression can be contributed clearly to AREA-deletion (yes: log2 fold change 20% stronger in ΔAREA compared to ΔAREB; no: not regulated in ΔAREA)
Transcription Factors are classified by interpro domains.
Orthologs of closely related Fungi F. verticillioides (F.vert), F. oxysporum (F.oxy), F. circinatum (F.circi), F. graminearum (F.grami) and F. solani (F.solani) were determined by Simap.
Species Codes	F. verticillioides (F.vert), F. oxysporum (F.oxy), F. circinatum (F.circi), F. graminearum (F.grami), F. solani (F.solani)
Ortholog	Protein with highest identity in the respective organism
Experimental Conditions	WT 60 mM Gln vs. WT 6 mM Gln (WT_60mM-WT_6mM), ∆AREA 6 mM Gln vs. WT 6 mM Gln (AREA_6mM-WT_6mM), ∆AREB 6 mM Gln vs. WT 6 mM Gln (AREB_6mM-WT_6mM), ∆AREA 60 mM Gln vs. WT 60 mM Gln (AREA_60mM-WT_60mM) and ∆AREB 60 mM Gln vs. WT 60 mM Gln (AREB_60mM-WT_60mM)
Gene Expression Data	Foldchange between two experimental conditions in log2 scale
		Promoter			Gene Expression Data						Orthologs in closely related Fusarium species
Gene ID	Name	GATA pairs	Type	Annotation	WT_60mM-WT_6mM	AREA_6mM-WT_6mM	AREB_6mM-WT_6mM	AREA_60mM-WT_60mM	AREB_60mM-WT_60mM	AreA regulated?	F.vert	F.oxy	F.circi	F.grami	F.solani
FFUJ_00012	Apf2	2	Basic-leucine zipper (bZIP) transcription factor	apicidin cluster - transcription factor	9.47803		2.07364		-6.0377	no	FVEG_04400	FOXG_17565	FCIRG_00808T1	FGSG_04596	neha_08573
FFUJ_00020		0	Zn(2)-C6 fungal-type DNA-binding domain	uncharacterized protein		-2.54162	-1.98284		-3.02604	yes	FVEG_10799	FOXG_14936	FCIRG_03343T1	FGSG_06382	neha_09233
FFUJ_00032		6	Transcription factor, fungi	uncharacterized protein					-2.31761	no	FVEG_12698	FOXG_09928	FCIRG_03353T1	FGSG_03294	neha_11971
FFUJ_00035		2	Transcription factor, fungi	uncharacterized protein					-1.23275	no	FVEG_00017	FOXG_10403	FCIRG_02713T1	FGSG_07674	neha_05634
FFUJ_00041		16	Zinc finger, C2H2; Transcription factor, fungi; Zinc finger, C2H2-type/integrase, DNA-binding; Zinc finger, C2H2-like	uncharacterized protein	-5.16439	-3.82995			1.11528	yes	FVEG_00011	FOXG_04741	FCIRG_02707T1	FGSG_16048	neha_14369
FFUJ_00047		3	Zn(2)-C6 fungal-type DNA-binding domain; Transcription factor, fungi	related to transcription activator amyR					1.69405	no	FVEG_00005	FOXG_11816	FCIRG_02701T1	FGSG_00069	neha_09210
FFUJ_00054		3	Zn(2)-C6 fungal-type DNA-binding domain	related to UPC2 - regulatory protein involved in control of sterol uptake		4.81611	2.37297			yes	FVEG_11745	FOXG_12966	FCIRG_02697T1	FGSG_17584	neha_11944
FFUJ_00094		7	Zn(2)-C6 fungal-type DNA-binding domain	uncharacterized protein	-1.73483		-1.787		-2.00734	no	FVEG_00066	FOXG_13431	FCIRG_01490T1	FGSG_08972	neha_09165
FFUJ_00107		4	Casein kinase II, regulatory subunit; Transcription factor, fungi	uncharacterized protein	1.02595	1.54135				yes	FVEG_12477	FOXG_10780	FCIRG_03497T1	FGSG_08380	neha_07912
FFUJ_00142		13	Transcription factor, fungi	related to purine utilization positive regulator					-2.71777	no	FVEG_00092	FOXG_05502	FCIRG_05907T1	FGSG_06516	neha_11795
FFUJ_00151		5	Transcription factor, fungi	uncharacterized protein		-1.15953	-1.09989		-2.07698	unclear	FVEG_04336	FOXG_04783	FCIRG_03794T1	FGSG_03727	neha_15095
FFUJ_00192		5	Zn(2)-C6 fungal-type DNA-binding domain	uncharacterized protein	2.5474		-1.40232		-2.21669	no	FVEG_00147	FOXG_01342	FCIRG_00384T1	FGSG_15692	neha_14290
FFUJ_00198		3	Zn(2)-C6 fungal-type DNA-binding domain; Protein of unknown function DUF3468	related to ARG81 - transcription factor involved in arginine metabolism		1.28809				yes	FVEG_00153	FOXG_01335	FCIRG_04874T1	FGSG_00144	neha_12794
FFUJ_00200		15	Transcription factor, fungi	uncharacterized protein	-3.10691	-1.5957	-2.99195		-1.97125	unclear	FVEG_00250	FOXG_04845	FCIRG_02423T1	FGSG_09075	neha_15620
FFUJ_00211		16	Zn(2)-C6 fungal-type DNA-binding domain; Transcription factor, fungi	related to C6 transcription factor	-6.20423	-3.23844	-1.79168		2.01418	yes	FVEG_00168	FOXG_01324	FCIRG_00402T1	FGSG_15697	neha_12823
FFUJ_00232		1	Zinc finger, CCCH-type	uncharacterized protein	-2.41698				2.79657	no	FVEG_00185	FOXG_01308	FCIRG_10599T1	FGSG_11696	neha_00103
FFUJ_00242		1	Proteasome component (PCI) domain; Tetratricopeptide-like helical; Winged helix-turn-helix transcription repressor DNA-binding; PCI/PINT associated module	probable COP9 complex subunit 2			-1.00575			no	FVEG_00197	FOXG_01298	FCIRG_11664T1	FGSG_00182	neha_12733
FFUJ_00259		9	Zn(2)-C6 fungal-type DNA-binding domain; Transcription factor, fungi	uncharacterized protein	1.48105	1.41641				yes	FVEG_00215	FOXG_01280	FCIRG_04574T1	FGSG_11709	neha_12701
FFUJ_00276		6	Zn(2)-C6 fungal-type DNA-binding domain; Transcription factor, fungi	related to C6 transcription factor			-1.0507		-1.19963	no	FVEG_00240	FOXG_01257	FCIRG_05943T1	FGSG_00217	neha_12689
FFUJ_00294		5	Zn(2)-C6 fungal-type DNA-binding domain; Transcription factor, fungi	related to cutinase transcription factor 1 beta					-1.28412	no	FVEG_00228	FOXG_01268	FCIRG_13492T1	FGSG_00227	neha_12669
FFUJ_00327		1	Zinc finger, C2H2; Zinc finger, C2H2-type/integrase, DNA-binding; Zinc finger, C2H2-like	related to zinc finger protein	1.26981				-1.10881	no	FVEG_00275	FOXG_01224	FCIRG_07347T1	FGSG_15715	neha_09503
FFUJ_00328		6	Zinc finger, C2H2; Zinc finger, C2H2-like	uncharacterized protein	-2.79854				2.32803	no	FVEG_01147	FOXG_02256	FCIRG_07346T1	FGSG_15715	neha_02880
FFUJ_00329		3	Zinc finger, C2H2; Zinc finger, C2H2-like	uncharacterized protein	-1.54186	4.21006			1.59048	yes	FVEG_00275	FOXG_01223	FCIRG_07346T1	FGSG_15715	neha_09503
FFUJ_00333		1	Zinc finger, C2H2; Zinc finger, C2H2-like	uncharacterized protein					-1.57224	no	FVEG_00280	FOXG_00980	FCIRG_15120T1	FGSG_15715	neha_08114
FFUJ_00334		2	Zinc finger, C2H2; Zinc finger, C2H2-like	uncharacterized protein	-2.06304	-1.34229			2.39524	yes	FVEG_00280	FOXG_09628	FCIRG_14332T1	FGSG_15849	neha_08915
FFUJ_00335		2	Zinc finger, C2H2; Zinc finger, C2H2-like	uncharacterized protein		-1.18837				yes	FVEG_00280	FOXG_02256	FCIRG_12777T1	FGSG_15716	neha_09503
FFUJ_00433		0	Zn(2)-C6 fungal-type DNA-binding domain; Transcription factor, fungi	uncharacterized protein			-1.2593			no	FVEG_00379	FOXG_01137	FCIRG_11000T1	FGSG_00800	neha_06787
FFUJ_00450		2	Cysteine/histidine-rich domain; Zinc finger, C2H2	uncharacterized protein					-1.51678	no	FVEG_00395	FOXG_01120	FCIRG_06381T1	FGSG_00785	neha_12009
FFUJ_00463		3	Zn(2)-C6 fungal-type DNA-binding domain; Protein of unknown function DUF3468	related to C6 zink-finger protein PRO1A			-1.04653			no	FVEG_00406	FOXG_01108	FCIRG_12854T1	FGSG_00774	neha_11195
FFUJ_00478		8	Zinc finger, C2H2; Zinc finger, C2H2-type/integrase, DNA-binding; Zinc finger, C2H2-like	uncharacterized protein	-3.9139	-3.14912			1.66667	yes	FVEG_00422	FOXG_01092	FCIRG_00128T1	FGSG_00764	neha_13007
FFUJ_00482		7	Zn(2)-C6 fungal-type DNA-binding domain	uncharacterized protein		-1.57657				yes	FVEG_00428	FOXG_01086	FCIRG_00122T1	FGSG_15777	neha_00134
FFUJ_00487		0	Helix-loop-helix DNA-binding	uncharacterized protein		1.22994			1.66354	yes	FVEG_00433	FOXG_01081	FCIRG_00118T1	FGSG_00750	neha_10023
FFUJ_00512		0	Zn(2)-C6 fungal-type DNA-binding domain; Transcription factor, fungi	uncharacterized protein	1.74559		2.54054		3.07126	no	FVEG_00459	FOXG_01056	FCIRG_08820T1	FGSG_00725	neha_09422
FFUJ_00547		1	Zinc finger, C2H2; RNA polymerase I specific transcription initiation factor, RRN9	uncharacterized protein			-1.32289			no	FVEG_00495	FOXG_01020	FCIRG_10458T1	FGSG_00696	neha_09682
FFUJ_00576		5	Zn(2)-C6 fungal-type DNA-binding domain; Transcription factor, fungi	uncharacterized protein	-1.01659	1.18847				yes	FVEG_00523	FOXG_00991	FCIRG_07816T1	FGSG_08179	neha_02770
FFUJ_00629		1	Zn(2)-C6 fungal-type DNA-binding domain; Transcription factor, fungi	uncharacterized protein			-1.75591		-1.06583	no	FVEG_00574	FOXG_00941	FCIRG_12685T1	FGSG_00967	neha_00446
FFUJ_00641		1	Zinc finger, C2H2; Tetraspanin	uncharacterized protein		-1.01357	-1.08299		-2.39806	unclear	FVEG_00577	FOXG_00938	FCIRG_12688T1	FGSG_15807	neha_06826
FFUJ_00702		2	TEA/ATTS	uncharacterized protein	-2.21247	-2.38558	-1.52532		1.76054	yes	FVEG_00646	FOXG_00850	FCIRG_07728T1	FGSG_11850	neha_08057
FFUJ_00815		3	Zn(2)-C6 fungal-type DNA-binding domain; Aflatoxin biosynthesis regulatory protein	related to UPC2 - regulatory protein involved in control of sterol uptake	-2.30032	1.42495			2.69704	yes	FVEG_00760	FOXG_00755	FCIRG_11255T1	FGSG_00313	neha_07669
FFUJ_00821		3	SANT domain, DNA binding; Homeodomain-like; Homeodomain-related; Myb, DNA-binding; MYB-like; Transcription regulator HTH, Myb-type, DNA-binding	related to DRPLA protein	-1.54263				1.70292	no	FVEG_00767	FOXG_00749	FCIRG_08719T1	FGSG_00318	neha_05747
FFUJ_00845		2	Zn(2)-C6 fungal-type DNA-binding domain; Transcription factor, fungi	uncharacterized protein			1.45234			no	FVEG_00794	FOXG_00721	FCIRG_02541T1	FGSG_15730	neha_05634
FFUJ_00944		1	Zinc finger, CCCH-type	uncharacterized protein					1.22459	no	FVEG_00887	FOXG_00625	FCIRG_04072T1	FGSG_00426	neha_12311
FFUJ_01094		5	Zn(2)-C6 fungal-type DNA-binding domain; Transcription factor, fungi	related to GAL4-like transcriptional activator	-1.37558		-2.20091			no	FVEG_01035	FOXG_00478	FCIRG_13921T1	FGSG_00573	neha_03111
FFUJ_01109		6	Zn(2)-C6 fungal-type DNA-binding domain	uncharacterized protein	-1.16572	-3.80181	-1.27515		-1.11719	yes	FVEG_01050	FOXG_00465	FCIRG_09069T1	FGSG_00586	neha_08551
FFUJ_01255		1	Zn(2)-C6 fungal-type DNA-binding domain; Transcription factor, fungi	related to cercosporin resistance protein			-1.04309			no	FVEG_01203	FOXG_00317	FCIRG_06595T1	FGSG_11891	neha_09104
FFUJ_01329		3	Helix-loop-helix DNA-binding	uncharacterized protein	4.74972		1.19767		-2.74568	no	FVEG_01266	FOXG_00250	FCIRG_11776T1	FGSG_01139	neha_04233
FFUJ_01356		0	DDE superfamily endonuclease, CENP-B-like; Pogo transposase / Cenp-B / PDC2, DNA-binding HTH domain; Helix-turn-helix, Psq; Homeodomain-like; Homeodomain-related	related to transposase			1.06546			no	FVEG_06625	FOXG_08210	FCIRG_05143T1	FGSG_16975	neha_05910
FFUJ_01566		1	High mobility group, HMG1/HMG2; High mobility group, superfamily	related to mating type 1-2 protein	1.46754				-1.34796	no	FVEG_01504	FOXG_00011	FCIRG_10885T1	FGSG_01366	neha_04012
FFUJ_01581		0	Zn(2)-C6 fungal-type DNA-binding domain; Transcription factor, fungi	related to transcription factor nirA			-1.41465		-1.33957	no	FVEG_09454	FOXG_11338	FCIRG_13226T1	FGSG_01378	neha_15103
FFUJ_01634		6	Zinc finger, C2H2; Zinc finger, C2H2-type/integrase, DNA-binding; Zinc finger, C2H2-like	uncharacterized protein			-1.76372		-3.17433	no	FVEG_07926	FOXG_02256	FCIRG_09828T1	FGSG_07187	neha_08810
FFUJ_01685		1	Zinc finger, C2H2; Zinc finger, C2H2-type/integrase, DNA-binding; Zinc finger, C2H2-like	related to zinc finger protein		-2.21424				yes	FVEG_09555	FOXG_11237	FCIRG_10329T1	FGSG_11961	neha_15005
FFUJ_01774		1	Zn(2)-C6 fungal-type DNA-binding domain; Transcription factor, fungi	probable ZFR1 regulator of fumonisin biosynthesis	-1.40075		-2.38486		-1.5534	no	FVEG_09648	FOXG_11142	FCIRG_14016T1	FGSG_01564	neha_14913
FFUJ_01798		13	Zn(2)-C6 fungal-type DNA-binding domain	uncharacterized protein	1.09794	-1.38468				yes	FVEG_09674	FOXG_11120	FCIRG_12230T1	FGSG_01293	neha_14891
FFUJ_01862		0	Zn(2)-C6 fungal-type DNA-binding domain; Transcription factor, fungi	related to pathway-specific nitrogen regulator			-1.04168			no	FVEG_09736	FOXG_11065	FCIRG_02037T1	FGSG_01638	neha_14820
FFUJ_01892		1	Zn(2)-C6 fungal-type DNA-binding domain	uncharacterized protein		2.63902			3.47714	yes	FVEG_09763	FOXG_11038	FCIRG_09461T1	FGSG_01669	neha_14849
FFUJ_01914		1	Winged helix-turn-helix transcription repressor DNA-binding; Methylated-DNA-[protein]-cysteine S-methyltransferase, DNA binding	related to MGMT family protein		1.26563				yes	FVEG_09784	FOXG_11016	FCIRG_12232T1	FGSG_01689	neha_14776
FFUJ_01949		1	Zn(2)-C6 fungal-type DNA-binding domain; Transcription factor, fungi	uncharacterized protein		2.88137			1.11282	yes	FVEG_09816	FOXG_10985	FCIRG_12221T1	FGSG_15877	neha_14757
FFUJ_01970		1	Zn(2)-C6 fungal-type DNA-binding domain; Transcription factor, fungi	related to transcription factor, SIN3 binding			-1.12126		-1.82627	no	FVEG_09834	FOXG_10970	FCIRG_05486T1	FGSG_01731	neha_14738
FFUJ_01988		1	Transcription factor, fungi	related to transcription activator protein acu-15					-1.55928	no	FVEG_09847	FOXG_10958	FCIRG_12216T1	FGSG_12798	neha_00496
FFUJ_02011		0	Zn(2)-C6 fungal-type DNA-binding domain; Transcription factor, fungi	related to quinic acid utilization activator			-2.86127		-1.08581	no	FVEG_05176	FOXG_08713	FCIRG_13733T1	FGSG_03878	neha_11591
FFUJ_02027		1	Zn(2)-C6 fungal-type DNA-binding domain	related to ARO80 - positive transcription regulator of ARO9 and ARO10	1.10627	2.3179	-1.30817		-1.78042	unclear	FVEG_10296	FOXG_11927	FCIRG_04107T1	FGSG_04109	neha_11581
FFUJ_02084		4	Basic-leucine zipper (bZIP) transcription factor	uncharacterized protein	-3.79263	-3.50697			1.40058	yes	FVEG_09938	FOXG_10863	FCIRG_08847T1	FGSG_02398	neha_10468
FFUJ_02091		1	DDE superfamily endonuclease, CENP-B-like; Pogo transposase / Cenp-B / PDC2, DNA-binding HTH domain; Helix-turn-helix, Psq; Homeodomain-like	related to transposase					-1.73397	no	FVEG_11995	FOXG_08210	FCIRG_09783T1	FGSG_16975	neha_00035
FFUJ_02098		4	Helix-loop-helix DNA-binding	related to helix-loop-helix protein	-3.56088		-2.18604			no	FVEG_09192	FOXG_15108	FCIRG_09860T1	FGSG_02516	neha_05945
FFUJ_02117	Fub10	4	Zn(2)-C6 fungal-type DNA-binding domain	fusaric acid cluster - transcription factor	9.99268	1.66719	2.29979		-6.10947	unclear	FVEG_12532	FOXG_15237	FCIRG_03380T1	FGSG_08080	neha_14891
FFUJ_02119	Fub12	3	Zn(2)-C6 fungal-type DNA-binding domain; Transcription factor, fungi	fusaric acid cluster - transcription factor	3.26415				-2.22116	no	FVEG_12534	FOXG_15235	FCIRG_03378T1	FGSG_03207	neha_09768
FFUJ_02120		0	Zn(2)-C6 fungal-type DNA-binding domain	uncharacterized protein	1.65175				-2.00718	no	FVEG_12536	FOXG_15234	FCIRG_08826T1	FGSG_16054	neha_02337
FFUJ_02137		4	Transcription factor, fungi	related to transcription activator			-1.62254			no	FVEG_12550	FOXG_15220	FCIRG_04552T1	FGSG_17662	neha_00903
FFUJ_02146		0	Zn(2)-C6 fungal-type DNA-binding domain; Transcription factor, fungi	uncharacterized protein		2.28997				yes	FVEG_05057	FOXG_13486	FCIRG_11281T1	FGSG_16711	neha_10518
FFUJ_02153		1	Transcription factor, fungi	related to transcriptional activator Mut3p		1.20394	-1.1966			unclear	FVEG_12562	FOXG_02014	FCIRG_12270T1	FGSG_06810	neha_13044
FFUJ_02156		2	Zn(2)-C6 fungal-type DNA-binding domain	related to C6 zink-finger protein PRO1A					-2.35185	no	FVEG_12565	FOXG_15183	FCIRG_09050T1	FGSG_17116	neha_07159
FFUJ_02169		1	Transcription factor, fungi	uncharacterized protein			-1.50655		-1.98848	no	FVEG_05844	FOXG_02014	FCIRG_11552T1	FGSG_16922	neha_02233
FFUJ_02194		3	Zn(2)-C6 fungal-type DNA-binding domain	uncharacterized protein		-3.26615			-2.19842	yes	FVEG_12596	FOXG_15282	FCIRG_07751T1	FGSG_07585	neha_07494
FFUJ_02223	PKS1-TF	5	Transcription factor, fungi	uncharacterized protein	5.3879				-3.59509	no	FVEG_12606	FOXG_15300	FCIRG_08178T1	FGSG_03783	neha_08715
FFUJ_02244		4	Zn(2)-C6 fungal-type DNA-binding domain; Transcription factor, fungi	uncharacterized protein		-1.62837	-2.07929		-3.28519	unclear	FVEG_12635	FOXG_15317	FCIRG_12930T1	FGSG_15684	neha_15267
FFUJ_02270		4	Zn(2)-C6 fungal-type DNA-binding domain	uncharacterized protein	-1.10234	-1.05371	-1.68733		-1.98046	unclear	FVEG_12674	FOXG_15341	FCIRG_10214T1	FGSG_16855	neha_05660
FFUJ_02276		4	Zn(2)-C6 fungal-type DNA-binding domain; Transcription factor, fungi	uncharacterized protein					-1.89439	no	FVEG_12668	FOXG_04845	FCIRG_12697T1	FGSG_09075	neha_02784
FFUJ_02295		2	Negative transcriptional regulator; FMN-binding split barrel-related; FMN-binding split barrel	probable transcriptional regulator	1.03563	1.42063				yes	FVEG_12686	FOXG_15359	FCIRG_01760T1	FGSG_07583	neha_07100
FFUJ_02304		1	Zn(2)-C6 fungal-type DNA-binding domain; Transcription factor, fungi	uncharacterized protein		1.44283	-1.44565			unclear	FVEG_05176	FOXG_13569	FCIRG_01753T1	FGSG_07575	neha_02751
FFUJ_02308		4	Zn(2)-C6 fungal-type DNA-binding domain	uncharacterized protein		6.77524	3.54182		5.03508	yes	FVEG_04014	FOXG_06157	FCIRG_01751T1	FGSG_09464	neha_07669
FFUJ_02310		4	Zn(2)-C6 fungal-type DNA-binding domain; Transcription factor, fungi	uncharacterized protein	-7.17949	-7.46404				yes	FVEG_12698	FOXG_09928	FCIRG_00340T1	FGSG_03294	neha_09455
FFUJ_02320		4	Transcription factor, fungi	uncharacterized protein			2.16061		1.09624	no	FVEG_05176	FOXG_02014	FCIRG_00334T1	FGSG_07568	neha_06972
FFUJ_02334		0	Zn(2)-C6 fungal-type DNA-binding domain; Transcription factor, fungi	related to lactose regulatory protein	1.23122	1.18668	1.39949			unclear	FVEG_12720	FOXG_15389	FCIRG_00319T1	FGSG_16075	neha_15220
FFUJ_02354		0	Zn(2)-C6 fungal-type DNA-binding domain; Transcription factor, fungi	related to Transcriptional activator of proteases prtT	1.02858		-1.08206		-2.28061	no	FVEG_12737	FOXG_15408	FCIRG_03179T1	FGSG_09147	neha_14338
FFUJ_02367		1	AT hook, DNA-binding motif; AT hook-like	uncharacterized protein	-3.38961		-1.95675		1.03882	no	FVEG_12751	FOXG_15421	FCIRG_14394T1	FGSG_07545	neha_15616
FFUJ_02398		1	Zn(2)-C6 fungal-type DNA-binding domain	related to Transcription factor ACEII			-2.16748			no	FVEG_12778	FOXG_15447	FCIRG_09669T1	FGSG_07521	neha_07170
FFUJ_02437		0	Zinc finger, C2H2-like	uncharacterized protein	-1.24117		-2.20466			no	FVEG_07772	FOXG_01406	FCIRG_09158T1	FGSG_11061	neha_07517
FFUJ_02459		1	Transcription factor jumonji/aspartyl beta-hydroxylase	probable phospholipase	2.02156		1.06544			no	FVEG_07796	FOXG_01432	FCIRG_07779T1	FGSG_16833	neha_13165
FFUJ_02467		10	Cyanate lyase, C-terminal; Cyanase; Lambda repressor-like, DNA-binding	probable cyanate lyase		-1.46745				yes	FVEG_07804	FOXG_01440	FCIRG_07361T1	FGSG_07458	neha_13157
FFUJ_02504		2	Basic-leucine zipper (bZIP) transcription factor	related to SRP40 - suppressor of mutant AC40 of RNA polymerase I and III		4.22724	3.15308		3.4239	yes	FVEG_07842	FOXG_01477	FCIRG_07994T1	FGSG_13146	neha_13200
FFUJ_02528		0	ARID/BRIGHT DNA-binding domain	related to small s protein		1.05567	1.06234			unclear	FVEG_07864	FOXG_01501	FCIRG_06764T1	FGSG_02409	neha_13230
FFUJ_02685		4	p53-like transcription factor, DNA-binding; NDT80 DNA-binding domain	related to acid phosphatase		-1.23231	-1.96092		-2.05026	unclear	FVEG_08005	FOXG_01644	FCIRG_14191T1	FGSG_07157	neha_13290
FFUJ_02729		1	High mobility group, HMG1/HMG2; Sterile alpha motif domain; High mobility group, superfamily; Sterile alpha motif/pointed domain; Sterile alpha motif, type 1	related to nonhistone chromosomal protein	1.3921		1.71224			no	FVEG_08051	FOXG_01686	FCIRG_05382T1	FGSG_07116	neha_10295
FFUJ_02750		2	Homeobox; Homeodomain-like; Homeodomain-related; Homeobox, conserved site	uncharacterized protein	-1.05956	-1.54026				yes	FVEG_08072	FOXG_01706	FCIRG_02614T1	FGSG_16777	neha_10275
FFUJ_02785		1	Zn(2)-C6 fungal-type DNA-binding domain	related to C6 zink-finger protein PRO1A	-3.3558	-2.16347			1.3782	yes	FVEG_08110	FOXG_01740	FCIRG_01398T1	FGSG_07067	neha_10244
FFUJ_02801	FfKlp1	1	Zinc finger, C2H2; Zinc finger, C2H2-type/integrase, DNA-binding; Zinc finger, C2H2-like	related to krueppel protein		-1.28126	-1.7798		-1.38856	unclear	FVEG_08125	FOXG_01756	FCIRG_01383T1	FGSG_16768	neha_10230
FFUJ_02890		4	Basic-leucine zipper (bZIP) transcription factor; Protein of unknown function DUF3425	uncharacterized protein					-1.1095	no	FVEG_08220	FOXG_01845	FCIRG_10868T1	FGSG_06968	neha_10468
FFUJ_02989		3	Zn(2)-C6 fungal-type DNA-binding domain; Zinc finger, C2H2; Zinc finger, C2H2-type/integrase, DNA-binding; Zinc finger, C2H2-like	probable transcription factor Pig1p			-1.03603			no	FVEG_14062	FOXG_01941	FCIRG_10195T1	FGSG_13008	neha_10377
FFUJ_03032		4	F-box domain, cyclin-like; Transcription factor jumonji/aspartyl beta-hydroxylase; Transcription factor jumonji; F-box domain, Skp2-like	related to phosphatidylserine-specific receptor		1.82281			1.62415	yes	FVEG_05146	FOXG_01986	FCIRG_03292T1	FGSG_06840	neha_10338
FFUJ_03177		1	Zn(2)-C6 fungal-type DNA-binding domain	uncharacterized protein	1.42004		1.15619			no	FVEG_05296	FOXG_02133	FCIRG_01479T1	FGSG_13109	neha_10572
FFUJ_03219		3	Pogo transposase / Cenp-B / PDC2, DNA-binding HTH domain; Centromere protein Cenp-B, DNA-binding domain 1; Homeodomain-like; Homeodomain-related	uncharacterized protein		-1.55186	-1.0371		-1.59355	yes	FVEG_05341	FOXG_02174	FCIRG_04688T2	FGSG_07243	neha_10613
FFUJ_03233		2	Transcription factor, fungi	uncharacterized protein		-1.15953			1.02696	yes	FVEG_05357	FOXG_02188	FCIRG_09584T1	FGSG_13098	neha_10626
FFUJ_03242		1	Zn(2)-C6 fungal-type DNA-binding domain	uncharacterized protein					-1.19546	no	FVEG_05367	FOXG_02197	FCIRG_06104T1	FGSG_16795	neha_10634
FFUJ_03247		16	Zinc finger, CCCH-type	uncharacterized protein		5.08749	2.50925		4.66894	yes	FVEG_05372	FOXG_02201	FCIRG_14115T1	FGSG_13848	neha_10637
FFUJ_03281		6	Zinc finger, C2H2-type/integrase, DNA-binding; Zinc finger, C2H2-like	uncharacterized protein					1.66415	no	FVEG_05406	FOXG_02234	FCIRG_02981T1	FGSG_06701	neha_10667
FFUJ_03284		12	Zn(2)-C6 fungal-type DNA-binding domain	uncharacterized protein	2.03415				-2.32764	no	FVEG_05410	FOXG_02238	FCIRG_02984T1	FGSG_06699	neha_10670
FFUJ_03410		1	Zn(2)-C6 fungal-type DNA-binding domain	related to cercosporin resistance protein		1.24067				yes	FVEG_05532	FOXG_02360	FCIRG_01910T1	FGSG_06593	neha_01400
FFUJ_03457		8	Zn(2)-C6 fungal-type DNA-binding domain	uncharacterized protein	-2.87558	-3.27244				yes	FVEG_06798	FOXG_09195	FCIRG_01453T1	FGSG_16256	neha_03832
FFUJ_03474		6	Zn(2)-C6 fungal-type DNA-binding domain	uncharacterized protein	1.70523		2.30319			no	FVEG_12688	FOXG_15361	FCIRG_14927T1	FGSG_16672	neha_03850
FFUJ_03495		0	Zn(2)-C6 fungal-type DNA-binding domain; Transcription factor, fungi	related to purine utilization positive regulator	1.1973				-1.42847	no	FVEG_06537	FOXG_02445	FCIRG_04543T1	FGSG_06516	neha_03866
FFUJ_03539		3	Zinc finger, C2H2; Zinc finger, C2H2-type/integrase, DNA-binding; Zinc finger, C2H2-like	uncharacterized protein		3.38007			1.74834	yes	FVEG_08948	FOXG_06048	FCIRG_09980T1	FGSG_13801	neha_12099
FFUJ_03542		5	Zn(2)-C6 fungal-type DNA-binding domain	related to C6 finger domain protein	-3.73517	-4.72947	-3.5015		-1.56801	yes	FVEG_12318	FOXG_13213	FCIRG_05891T1	FGSG_11148	neha_09340
FFUJ_03585		2	Zn(2)-C6 fungal-type DNA-binding domain; Transcription factor, fungi	related to positive activator of transcription					-1.31111	no	FVEG_03744	FOXG_02521	FCIRG_13835T1	FGSG_11462	neha_11422
FFUJ_03588		0	Zn(2)-C6 fungal-type DNA-binding domain; Transcription factor, fungi	related to cutinase transcription factor 1 beta	-2.41377		-1.31972			no	FVEG_05712	FOXG_02524	FCIRG_12052T1	FGSG_16188	neha_08678
FFUJ_03660		10	Transcription factor, fungi	related to pathway-specific regulatory protein nit-4	-1.21133	-2.79262	-1.44957		-3.61738	yes	FVEG_05757	FOXG_02592	FCIRG_10656T1	FGSG_16663	neha_08719
FFUJ_03663		3	Zn(2)-C6 fungal-type DNA-binding domain; Aflatoxin biosynthesis regulatory protein	uncharacterized protein	1.14194				1.60028	no	FVEG_13314	FOXG_02595	FCIRG_09240T1	FGSG_12611	neha_12887
FFUJ_03672		2	Zn(2)-C6 fungal-type DNA-binding domain	uncharacterized protein			-1.19021			no	FVEG_05776	FOXG_10403	FCIRG_10734T1	FGSG_07693	neha_14254
FFUJ_03692		5	Zn(2)-C6 fungal-type DNA-binding domain	uncharacterized protein	-2.69039	-2.17588	-1.22944			yes	FVEG_05793	FOXG_02624	FCIRG_03542T1	FGSG_16867	neha_13892
FFUJ_03711		0	Zn(2)-C6 fungal-type DNA-binding domain	uncharacterized protein	3.34929				-2.81478	no	FVEG_03456	FOXG_15234	FCIRG_12128T1	FGSG_16472	neha_11092
FFUJ_03754		1	Zn(2)-C6 fungal-type DNA-binding domain; Zinc finger, C2H2; Transcription factor, fungi; Zinc finger, C2H2-type/integrase, DNA-binding; Zinc finger, C2H2-like	probable transcription factor Pig1p	-2.07735	-1.85864	-1.91918			unclear	FVEG_03484	FOXG_05633	FCIRG_02873T1	FGSG_13008	neha_14126
FFUJ_03759		2	Zn(2)-C6 fungal-type DNA-binding domain	uncharacterized protein					1.45514	no	FVEG_11861	FOXG_08863	FCIRG_02878T1	FGSG_05789	neha_10774
FFUJ_03763		3	Zn(2)-C6 fungal-type DNA-binding domain	uncharacterized protein	-1.38546				1.67248	no	FVEG_08771	FOXG_11146	FCIRG_04676T1	FGSG_01562	neha_14915
FFUJ_03765		4	Zinc finger, GATA-type; Zinc finger, NHR/GATA-type	uncharacterized protein	-1.71097		-1.28124			no	FVEG_03493	FOXG_01701	FCIRG_02621T1	FGSG_07102	neha_10279
FFUJ_03786		0	Zn(2)-C6 fungal-type DNA-binding domain; Transcription factor, fungi	related to positive regulator of PUT (proline utilization) genes			-1.24022			no	FVEG_03514	FOXG_05661	FCIRG_08122T1	FGSG_16424	neha_11083
FFUJ_03804		13	Zn(2)-C6 fungal-type DNA-binding domain; Aflatoxin biosynthesis regulatory protein	uncharacterized protein			-1.15206			no	FVEG_01650	FOXG_05667	FCIRG_09406T1	FGSG_04862	neha_10827
FFUJ_03879		2	Zn(2)-C6 fungal-type DNA-binding domain; Zinc finger, C2H2; Zinc finger, C2H2-type/integrase, DNA-binding; Zinc finger, C2H2-like	uncharacterized protein	-3.95222		-1.85844		2.96067	no	FVEG_03599	FOXG_05745	FCIRG_14651T1	FGSG_11061	neha_07517
FFUJ_03912		3	Zn(2)-C6 fungal-type DNA-binding domain	uncharacterized protein	-1.53528	-3.70248				yes	FVEG_03649	FOXG_05763	FCIRG_07415T1	FGSG_09147	neha_14338
FFUJ_03942		1	Zn(2)-C6 fungal-type DNA-binding domain; Transcription factor, fungi	uncharacterized protein	1.81318	2.2126	1.01451		-4.09583	yes	FVEG_03659	FOXG_05790	FCIRG_10759T1	FGSG_00967	neha_01169
FFUJ_03974		4	Zinc finger, C2H2; Zinc finger, C2H2-type/integrase, DNA-binding; Zinc finger, C2H2-like	related to zinc finger protein odd-paired-like (opl)	-2.67932	-2.62892	-2.60511			unclear	FVEG_03687	FOXG_11128	FCIRG_10848T1	FGSG_01576	neha_14901
FFUJ_03975		1	Zn(2)-C6 fungal-type DNA-binding domain	uncharacterized protein	-3.84443	-2.09872	-2.34522			unclear	FVEG_01050	FOXG_00465	FCIRG_10849T1	FGSG_00586	neha_08551
FFUJ_03989	Fsr6	3	Zn(2)-C6 fungal-type DNA-binding domain; Aflatoxin regulatory protein	fusarubin cluster - transcription factor		-1.37948				yes	FVEG_03700	FOXG_05821	FCIRG_12133T1	FGSG_17171	neha_15671
FFUJ_04016		1	Zn(2)-C6 fungal-type DNA-binding domain	related to cercosporin resistance protein	1.87842		1.55873			no	FVEG_03728	FOXG_05850	FCIRG_03774T1	FGSG_16522	neha_14200
FFUJ_04038		0	Zn(2)-C6 fungal-type DNA-binding domain; Transcription factor, fungi	uncharacterized protein	-1.07747		-1.01962			no	FVEG_00523	FOXG_05874	FCIRG_11544T1	FGSG_08179	neha_02770
FFUJ_04043		0	Zn(2)-C6 fungal-type DNA-binding domain	uncharacterized protein			-1.04564			no	FVEG_03752	FOXG_05879	FCIRG_01949T1	FGSG_13566	neha_11539
FFUJ_04044		0	Transcription factor, fungi	related to transcription activator protein acu-15			-1.15201			no	FVEG_02639	FOXG_05880	FCIRG_01948T1	FGSG_17195	neha_11538
FFUJ_04054		0	Zn(2)-C6 fungal-type DNA-binding domain; Transcription factor, fungi	uncharacterized protein			-2.18731		-1.57588	no	FVEG_09421	FOXG_05890	FCIRG_01937T1	FGSG_09331	neha_00014
FFUJ_04056		1	Zn(2)-C6 fungal-type DNA-binding domain; Transcription factor, fungi	related to Pdr3p	1.7109	1.4966			-1.17323	yes	FVEG_09208	FOXG_05892	FCIRG_01935T1	FGSG_09333	neha_15413
FFUJ_04132		0	Basic-leucine zipper (bZIP) transcription factor	uncharacterized protein			-1.15301			no	FVEG_03831a	FOXG_14212	FCIRG_08173T1	FGSG_09277	neha_03637
FFUJ_04184		4	Zn(2)-C6 fungal-type DNA-binding domain; Transcription factor, fungi	related to Mal63p, YPR196w and Mal13p		1.01525			1.11158	yes	FVEG_03883	FOXG_06016	FCIRG_12322T1	FGSG_17180	neha_03692
FFUJ_04220		0	Zinc finger, C2H2; Transcription factor, fungi; Zinc finger, C2H2-type/integrase, DNA-binding; Zinc finger, C2H2-like	related to C2H2 zinc finger protein			-1.47508			no	FVEG_03915	FOXG_06048	FCIRG_08537T1	FGSG_09368	neha_12595
FFUJ_04332		3	Zn(2)-C6 fungal-type DNA-binding domain	uncharacterized protein			-1.01456			no	FVEG_04014	FOXG_06157	FCIRG_02382T1	FGSG_09464	neha_03534
FFUJ_04390	Tam1	10	Transcription factor, fungi	related to DAL81 - transcriptional activator for allantoin and GABA catabolic genes	-2.36447	-3.41897	-3.2924		-4.4143	unclear	FVEG_04074	FOXG_06221	FCIRG_01403T1	FGSG_17229	neha_03586
FFUJ_04435		2	Homeobox; Pogo transposase / Cenp-B / PDC2, DNA-binding HTH domain; Zinc finger, C2H2; Homeobox KN domain; Homeodomain-like; Homeodomain-related; Zinc finger, C2H2-like	related to monocarboxylate transporter 4		2.5198				yes	FVEG_04120	FOXG_06267	FCIRG_10143T1	FGSG_17238	neha_03356
FFUJ_04464		2	Zn(2)-C6 fungal-type DNA-binding domain; Transcription factor, fungi	uncharacterized protein			-1.14106			no	FVEG_04148	FOXG_06298	FCIRG_10963T1	FGSG_09594	neha_03387
FFUJ_04474		0	Transcription factor jumonji/aspartyl beta-hydroxylase; Transcription factor jumonji	uncharacterized protein			-1.53296			no	FVEG_02294	FOXG_03422	FCIRG_08553T1	FGSG_13613	neha_03395
FFUJ_04489		1	Cullin, N-terminal; Winged helix-turn-helix transcription repressor DNA-binding; Cullin, conserved site; Cullin homology; Cullin repeat-like-containing domain; Cullin protein, neddylation domain	probable SCF complex member Cullin 1			-1.07226			no	FVEG_04172	FOXG_06323	FCIRG_01113T1	FGSG_09616	neha_03407
FFUJ_04557		0	DNA-binding SAP; Ku70/Ku80 C-terminal arm; Ku70/Ku80, N-terminal alpha/beta; DNA helicase, ATP-dependent, Ku type; DNA helicase, ATP-dependent, Ku70 subunit; Spen Paralogue and Orthologue SPOC, C-terminal-like	related to ATP-dependent DNA helicase II, 70 kDa subunit	1.10609	1.10784				yes	FVEG_04235	FOXG_06386	FCIRG_09700T1	FGSG_12711	neha_14505
FFUJ_04566	NirA	2	Zn(2)-C6 fungal-type DNA-binding domain; Transcription factor, fungi	related to transcription activator					1.71683	no	FVEG_04245	FOXG_06395	FCIRG_14051T1	FGSG_17662	neha_14514
FFUJ_04592		1	Zn(2)-C6 fungal-type DNA-binding domain; Transcription factor, fungi	uncharacterized protein					1.1983	no	FVEG_04271	FOXG_06423	FCIRG_00442T1	FGSG_17664	neha_06787
FFUJ_04612		1	Zn(2)-C6 fungal-type DNA-binding domain; Transcription factor, fungi	uncharacterized protein	-1.1022		-1.3076			no	FVEG_04292	FOXG_06446	FCIRG_00419T1	FGSG_05370	neha_06768
FFUJ_04699		3	Transcription regulator HTH, APSES-type DNA-binding domain	uncharacterized protein	1.833				-2.28583	no	FVEG_06416	FOXG_08256	FCIRG_13768T1	FGSG_09802	neha_03286
FFUJ_04723		1	Zn(2)-C6 fungal-type DNA-binding domain	uncharacterized protein		-1.53607	1.76464			unclear	FVEG_06393	FOXG_08281	FCIRG_05035T1	FGSG_17269	neha_03258
FFUJ_04739		3	Zinc finger, C2H2; Transcription factor, fungi; Zinc finger, C2H2-type/integrase, DNA-binding; Zinc finger, C2H2-like	related to C2H2 zinc finger protein	-1.2056				1.35896	no	FVEG_06378	FOXG_08297	FCIRG_06325T1	FGSG_09770	neha_03238
FFUJ_04828		1	Zn(2)-C6 fungal-type DNA-binding domain; Transcription factor, fungi	related to Zn(II)2Cys6 transcriptional activator	-3.04511				3.3285	no	FVEG_06286	FOXG_08392	FCIRG_01973T1	FGSG_13625	neha_09486
FFUJ_04902		5	Transcription factor, fungi	related to GAL4-like transcriptional activator	-7.95997	-7.15313	-6.34915		2.27607	unclear	FVEG_09834	FOXG_02014	FCIRG_14029T1	FGSG_17658	neha_03014
FFUJ_04920		6	Regulator of G protein signalling; DEP domain; Winged helix-turn-helix transcription repressor DNA-binding; Regulator of G protein signalling superfamily	probable developmental regulator flbA			-1.03717		-1.58864	no	FVEG_06192	FOXG_08482	FCIRG_08165T1	FGSG_16620	neha_03035
FFUJ_04988		2	Zn(2)-C6 fungal-type DNA-binding domain	related to UPC2 - regulatory protein involved in control of sterol uptake	-1.4943	-1.20434	-2.52176		-1.17331	unclear	FVEG_06118	FOXG_08550	FCIRG_09490T1	FGSG_06160	neha_03100
FFUJ_05009		1	Ubiquitin system component Cue; Oxoglutarate/iron-dependent oxygenase; Zinc finger, GRF-type	related to CUE domain protein	1.75009				-1.68502	no	FVEG_02584	FOXG_05555	FCIRG_05029T1	FGSG_16456	neha_03122
FFUJ_05016		0	Zn(2)-C6 fungal-type DNA-binding domain	uncharacterized protein		1.43417				yes	FVEG_06089	FOXG_08580	FCIRG_13032T1	FGSG_05102	neha_03129
FFUJ_05048	AreB	16	Zinc finger, GATA-type; Zinc finger, NHR/GATA-type	probable GATA type zinc finger protein asd4	-1.92077	-1.7518	-9.53786		-7.66009	unclear	FVEG_06055	FOXG_08613	FCIRG_15036T1	FGSG_16452	neha_03159
FFUJ_05056		1	Zn(2)-C6 fungal-type DNA-binding domain; Transcription factor, fungi	related to acetate regulatory DNA binding protein FacB			-1.36765			no	FVEG_06046	FOXG_08626	FCIRG_10073T1	FGSG_17645	neha_03164
FFUJ_05086		1	Zinc finger, C2H2; Zinc finger, C2H2-like	uncharacterized protein	1.5352	2.88389	1.54205		1.40652	yes	FVEG_06014	FOXG_02256	FCIRG_09883T1	FGSG_05041	neha_02880
FFUJ_05147		1	Zn(2)-C6 fungal-type DNA-binding domain	QA-1F quinic acid utilization activator QA-1F	-1.17355		-1.93222			no	FVEG_11865	FOXG_08713	FCIRG_13805T1	FGSG_16528	neha_02774
FFUJ_05155		10	Zn(2)-C6 fungal-type DNA-binding domain	uncharacterized protein			2.12761			no	FVEG_00147	FOXG_03762	FCIRG_06556T1	FGSG_15987	neha_02802
FFUJ_05156		9	Zn(2)-C6 fungal-type DNA-binding domain	related to nitrate assimilation regulatory protein nirA	-1.21023	-2.57461	-1.97205			yes	FVEG_02398	FOXG_16184	FCIRG_06555T1	FGSG_16284	neha_00797
FFUJ_05169		14	Zn(2)-C6 fungal-type DNA-binding domain; Aflatoxin biosynthesis regulatory protein	related to C6 transcription factor	3.52057	4.66739				yes	FVEG_05939	FOXG_08724	FCIRG_08706T1	FGSG_05716	neha_02745
FFUJ_05172		0	Zn(2)-C6 fungal-type DNA-binding domain; Transcription factor, fungi	related to C6 transcription factor	-1.91319		-1.82338			no	FVEG_05935	FOXG_08728	FCIRG_08702T1	FGSG_03159	neha_02147
FFUJ_05179		2	Zn(2)-C6 fungal-type DNA-binding domain	uncharacterized protein	-4.12477	-3.74262	-2.41568			yes	FVEG_05929	FOXG_08737	FCIRG_08015T1	FGSG_12244	neha_07619
FFUJ_05199		6	Zn(2)-C6 fungal-type DNA-binding domain; Transcription factor, fungi	related to transcription activator protein acu-15		1.88605			1.36857	yes	FVEG_05913	FOXG_08756	FCIRG_14008T1	FGSG_12798	neha_02822
FFUJ_05246		0	Zn(2)-C6 fungal-type DNA-binding domain	related to ARCA protein			-1.22616		-1.07229	no	FVEG_02082	FOXG_03208	FCIRG_10442T1	FGSG_04701	neha_08909
FFUJ_05266		1	Zn(2)-C6 fungal-type DNA-binding domain; Transcription factor, fungi	uncharacterized protein	-1.35297		-1.4571			no	FVEG_05852	FOXG_01610	FCIRG_10384T1	FGSG_16056	neha_11256
FFUJ_05278		1	Zn(2)-C6 fungal-type DNA-binding domain; Transcription factor, fungi	uncharacterized protein			-1.22987		-1.17055	no	FVEG_05839	FOXG_08830	FCIRG_10056T1	FGSG_16548	neha_09216
FFUJ_05299		0	Zinc finger, RING-type; Zinc finger, C2H2; Zinc finger, RING/FYVE/PHD-type; Zinc finger, C2H2-like	related to E3 ubiquitin ligase		1.16271				yes	FVEG_05819	FOXG_08846	FCIRG_13078T1	FGSG_16545	neha_02583
FFUJ_05302		2	Zn(2)-C6 fungal-type DNA-binding domain; Transcription factor, fungi	uncharacterized protein	1.25906	3.4448			1.40091	yes	FVEG_05816	FOXG_08849	FCIRG_13555T1	FGSG_16543	neha_02579
FFUJ_05318		5	Zn(2)-C6 fungal-type DNA-binding domain	uncharacterized protein	-1.97538		-1.79099			no	FVEG_11861	FOXG_08863	FCIRG_02878T1	FGSG_05789	neha_10774
FFUJ_05345		2	O-methyltransferase, family 2; Winged helix-turn-helix transcription repressor DNA-binding; O-methyltransferase, COMT, eukaryota	related to O-methyltransferase GliM		1.83115				yes	FVEG_13311	FOXG_11561	FCIRG_13184T1	FGSG_10331	neha_11058
FFUJ_05372		0	Zn(2)-C6 fungal-type DNA-binding domain	uncharacterized protein					-2.48519	no	FVEG_12582	FOXG_16486	FCIRG_01746T1	FGSG_03508	neha_15533
FFUJ_05381		0	Transcription factor, fungi	uncharacterized protein	-2.48577	-1.32202	-2.0513		-1.32032	unclear	FVEG_13291	FOXG_15824	FCIRG_01646T1	FGSG_09770	neha_08632
FFUJ_05394		6	Zn(2)-C6 fungal-type DNA-binding domain	uncharacterized protein	-2.50535	-1.49647	-1.8553			unclear	FVEG_03514	FOXG_05759	FCIRG_01634T1	FGSG_09123	neha_11493
FFUJ_05399		7	Zn(2)-C6 fungal-type DNA-binding domain	uncharacterized protein	-1.52262	-2.42571			-1.81379	yes	FVEG_13276	FOXG_15806	FCIRG_14228T1	FGSG_16367	neha_08723
FFUJ_05403		4	Transcription factor, fungi	related to transcriptional activator acu-15	2.39357				-2.92058	no	FVEG_13272	FOXG_15802	FCIRG_12984T1	FGSG_16228	neha_02357
FFUJ_05422		1	Zn(2)-C6 fungal-type DNA-binding domain	uncharacterized protein			-1.44738			no	FVEG_13258	FOXG_15780	FCIRG_03931T1	FGSG_15944	neha_10969
FFUJ_05423		3	Basic-leucine zipper (bZIP) transcription factor	uncharacterized protein					-1.389	no	FVEG_07842	FOXG_14212	FCIRG_08173T1	FGSG_09277	neha_03637
FFUJ_05426		4	Zinc finger, C2H2; Transcription factor, fungi; Zinc finger, C2H2-type/integrase, DNA-binding; Zinc finger, C2H2-like	uncharacterized protein			-1.25409		-2.51742	no	FVEG_02103	FOXG_15777	FCIRG_01565T1	FGSG_17423	neha_07548
FFUJ_05431		1	Transcription factor, fungi	uncharacterized protein					-3.52368	no	FVEG_13241	FOXG_15772	FCIRG_01567T1	FGSG_05157	neha_03988
FFUJ_05496		4	Zn(2)-C6 fungal-type DNA-binding domain	uncharacterized protein	3.90128	4.89898	1.76306			yes	FVEG_13179	FOXG_15695	FCIRG_07840T1	FGSG_16387	neha_07215
FFUJ_05511		0	Zn(2)-C6 fungal-type DNA-binding domain	related to regulatory protein alcR	-2.59287	-1.96138	-2.09741			unclear	FVEG_13171	FOXG_15708	FCIRG_13881T1	FGSG_02874	neha_07154
FFUJ_05520		3	Transcription factor, fungi	related to positive activator of transcription	1.46174	1.36576			-1.29683	yes	FVEG_13162	FOXG_15717	FCIRG_06152T1	FGSG_02825	neha_08894
FFUJ_05571		12	Zn(2)-C6 fungal-type DNA-binding domain	uncharacterized protein			-1.09852		-2.31142	no	FVEG_13117	FOXG_15657	FCIRG_09321T1	FGSG_16395	neha_11743
FFUJ_05640		12	Zn(2)-C6 fungal-type DNA-binding domain	uncharacterized protein					-1.13432	no	FVEG_02537	FOXG_03663	FCIRG_11676T1	FGSG_08930	neha_08560
FFUJ_05741		0	Ankyrin repeat; Zinc finger, C2H2; Ankyrin repeat-containing domain	related to Found in Mitochondrial Proteome		2.15923			1.71052	yes	FVEG_02433	FOXG_03560	FCIRG_07453T1	FGSG_08845	neha_08420
FFUJ_05755		3	Zn(2)-C6 fungal-type DNA-binding domain; Transcription factor, fungi	probable C6 transcription factor			1.0276			no	FVEG_02420	FOXG_03548	FCIRG_14925T1	FGSG_09594	neha_02668
FFUJ_05767		4	Transcription factor, fungi	related to transcriptional activator Mut3p	-1.91481		1.30643		2.79024	no	FVEG_02409	FOXG_03540	FCIRG_12356T1	FGSG_08831	neha_08379
FFUJ_05777		0	Zn(2)-C6 fungal-type DNA-binding domain; Transcription factor, fungi	uncharacterized protein	1.55232				-1.86797	no	FVEG_02401	FOXG_03533	FCIRG_02727T1	FGSG_16963	neha_06358
FFUJ_05832		0	Zn(2)-C6 fungal-type DNA-binding domain; Transcription factor, fungi	uncharacterized protein		1.14966	-1.11502		1.42753	unclear	FVEG_02346	FOXG_03479	FCIRG_01379T1	FGSG_13386	neha_07861
FFUJ_05839		0	Zn(2)-C6 fungal-type DNA-binding domain	related to C6 transcription factor			-1.10922			no	FVEG_02340	FOXG_03472	FCIRG_10264T1	FGSG_08349	neha_07885
FFUJ_05857		3	Transcription factor, fungi	uncharacterized protein			-1.68889			no	FVEG_02324	FOXG_03453	FCIRG_05696T1	FGSG_17048	neha_07904
FFUJ_05884		6	Copper fist DNA-binding	related to transcription activator CUP2			1.25214			no	FVEG_02301	FOXG_03428	FCIRG_12381T1	FGSG_08393	neha_07926
FFUJ_05893		4	Phosphoenolpyruvate carboxykinase, ATP-utilising; Zinc finger, U1-type; Zinc finger, C2H2; Phosphoenolpyruvate carboxykinase, N-terminal; Phosphoenolpyruvate carboxykinase, C-terminal; Zinc finger, C2H2-like; Phosphoenolpyruvate carboxykinase (ATP), conserved site	probable PCK1 - phosphoenolpyruvate carboxykinase		-1.15251				yes	FVEG_02289	FOXG_03418	FCIRG_13998T1	FGSG_08601	neha_07934
FFUJ_05962		2	Zn(2)-C6 fungal-type DNA-binding domain	uncharacterized protein	1.10882				-1.04495	no	FVEG_02219	FOXG_03347	FCIRG_07859T1	FGSG_13344	neha_08270
FFUJ_06078		4	Zinc finger, C2H2; Transcription factor, fungi; Zinc finger, C2H2-type/integrase, DNA-binding; Zinc finger, C2H2-like	related to regulatory protein amdA	-2.15205		-1.69337			no	FVEG_02103	FOXG_03231	FCIRG_13153T1	FGSG_17038	neha_08168
FFUJ_06082		1	Copper fist DNA-binding; Copper fist DNA-binding, conserved site	related to putative copper-activated transcription factor	1.09135				-1.07183	no	FVEG_02098	FOXG_03227	FCIRG_14129T1	FGSG_08431	neha_08172
FFUJ_06125		7	Zinc finger, C2H2; Zinc finger, C2H2-type/integrase, DNA-binding; Zinc finger, C2H2-like	related to zinc finger protein			1.01522			no	FVEG_02052	FOXG_03183	FCIRG_07484T1	FGSG_08617	neha_08114
FFUJ_06143	AreA	0	Zinc finger, GATA-type; Zinc finger, NHR/GATA-type; Protein of unknown function DUF1752, fungi	probable nitrogen catabolic enzyme regulatory protein NIT-2		-10.1646				yes	FVEG_02033	FOXG_03165	FCIRG_03422T1	FGSG_08634	neha_08337
FFUJ_06195		0	Zinc finger, PARP-type	related to transcriptional regulator atrx homolog	-1.71893	-1.01474				yes	FVEG_01980	FOXG_03118	FCIRG_04353T1	FGSG_13319	neha_08288
FFUJ_06263	PKS7-TF	2	Zn(2)-C6 fungal-type DNA-binding domain; Zinc finger, C2H2; Transcription factor, fungi; Zinc finger, C2H2-type/integrase, DNA-binding; Zinc finger, C2H2-like	related to transcription factor Pig1p			-1.03703			no	FVEG_01911	FOXG_03048	FCIRG_07019T1	FGSG_08791	neha_08053
FFUJ_06358		1	Zn(2)-C6 fungal-type DNA-binding domain; Transcription factor, fungi	related to cutinase transcription factor 1 beta			-1.47846		-1.39064	no	FVEG_01812	FOXG_02960	FCIRG_11118T1	FGSG_15882	neha_14168
FFUJ_06382		0	Zn(2)-C6 fungal-type DNA-binding domain; Transcription factor, fungi	uncharacterized protein			-2.20718		-1.52597	no	FVEG_01794	FOXG_02937	FCIRG_12037T1	FGSG_00227	neha_11256
FFUJ_06416		3	Zn(2)-C6 fungal-type DNA-binding domain	uncharacterized protein		1.23724	1.11874			unclear	FVEG_01760	FOXG_02904	FCIRG_12458T1	FGSG_16090	neha_15133
FFUJ_06446		1	Transcription factor, fungi	uncharacterized protein	-2.49725	-6.71297	-6.33142		-5.2901	unclear	FVEG_12193	FOXG_02886	FCIRG_04033T1	FGSG_01293	neha_07497
FFUJ_06466		0	Zinc finger, C2H2	uncharacterized protein	-2.51833	2.56664			3.39814	yes	FVEG_01714	FOXG_13289	FCIRG_12436T1	FGSG_15807	neha_06826
FFUJ_06512		1	Zn(2)-C6 fungal-type DNA-binding domain	uncharacterized protein	1.01074	1.40747				yes	FVEG_12536	FOXG_13929	FCIRG_03923T1	FGSG_04311	neha_07654
FFUJ_06522		4	Zn(2)-C6 fungal-type DNA-binding domain; Protein of unknown function DUF3468	ARG81 - Transcription factor involved in arginine metabolism	-4.55495	-3.65466	-1.19344			yes	FVEG_01663	FOXG_10036	FCIRG_02775T1	FGSG_03214	neha_07266
FFUJ_06526		3	Zn(2)-C6 fungal-type DNA-binding domain; Transcription factor, fungi	uncharacterized protein			-1.45253			no	FVEG_01658	FOXG_02828	FCIRG_02777T1	FGSG_03201	neha_01994
FFUJ_06532		0	Zinc finger, C2H2	uncharacterized protein	1.63065		1.09578			no	FVEG_01655	FOXG_02824	FCIRG_02780T1	FGSG_08138	neha_11161
FFUJ_06596		1	Zn(2)-C6 fungal-type DNA-binding domain	uncharacterized protein	-1.70122				1.48379	no	FVEG_13302	FOXG_02769	FCIRG_03661T1	FGSG_03919	neha_07073
FFUJ_06607		6	Zn(2)-C6 fungal-type DNA-binding domain; Transcription factor, fungi	related to cutinase transcription factor 1 beta			-2.02226		-1.88311	no	FVEG_01591	FOXG_02763	FCIRG_03573T1	FGSG_08064	neha_06264
FFUJ_06646		1	Zn(2)-C6 fungal-type DNA-binding domain	uncharacterized protein	-1.78946	-2.35875	-1.8514		-2.41475	yes	FVEG_09303	FOXG_10655	FCIRG_11985T1	FGSG_15995	neha_12978
FFUJ_06649		4	Zn(2)-C6 fungal-type DNA-binding domain	related to 3-oxoacyl-[acyl-carrier-protein] reductase		1.49044				yes	FVEG_01528	FOXG_08626	FCIRG_02845T1	FGSG_16858	neha_14660
FFUJ_06658		0	Zn(2)-C6 fungal-type DNA-binding domain; Transcription factor, fungi	related to STB5 - SIN3 binding protein			-1.04494			no	FVEG_06537	FOXG_02701	FCIRG_02252T1	FGSG_13457	neha_15331
FFUJ_06684		6	Zn(2)-C6 fungal-type DNA-binding domain; Transcription factor, fungi	related to Zn(II)2Cys6 transcriptional activator	-2.46788		-2.14222			no	FVEG_14130	FOXG_03543	FCIRG_08879T1	FGSG_16959	neha_12868
FFUJ_06697		7	Zn(2)-C6 fungal-type DNA-binding domain; Transcription factor, fungi	related to cutinase transcription factor 1 beta			-1.05822		-1.10234	no	FVEG_14132	FOXG_02659	FCIRG_04916T1	FGSG_08034	neha_06071
FFUJ_06714		3	Zn(2)-C6 fungal-type DNA-binding domain; Transcription factor, fungi	uncharacterized protein	-3.97208	-3.26455	-1.47303			yes	FVEG_03412	FOXG_04712	FCIRG_13586T1	FGSG_16274	neha_09524
FFUJ_06716		0	Zn(2)-C6 fungal-type DNA-binding domain	uncharacterized protein			-1.27634			no	FVEG_13681	FOXG_16556	FCIRG_04010T1	FGSG_03485	neha_12834
FFUJ_06723		0	Zn(2)-C6 fungal-type DNA-binding domain; Transcription factor, fungi	related to transcriptional activator Mut3p	4.42989	1.47063	1.79321		-4.3008	unclear	FVEG_05176	FOXG_02014	FCIRG_04016T1	FGSG_06810	neha_13394
FFUJ_06727		1	Transcription factor, fungi	uncharacterized protein					-1.23722	no	FVEG_03422	FOXG_06048	FCIRG_04020T1	FGSG_17561	neha_07024
FFUJ_06737		3	Zn(2)-C6 fungal-type DNA-binding domain; Transcription factor, fungi	related to cutinase transcription factor 1 beta	-1.64896		-1.2207			no	FVEG_03391	FOXG_04743	FCIRG_05874T1	FGSG_15882	neha_14168
FFUJ_06739		0	Zn(2)-C6 fungal-type DNA-binding domain; Transcription factor, fungi	uncharacterized protein			-1.18685			no	FVEG_03393	FOXG_04745	FCIRG_05875T1	FGSG_16414	neha_13071
FFUJ_06746	Bik5	1	Zn(2)-C6 fungal-type DNA-binding domain; Transcription factor, fungi	bikaverin cluster - transcription factor	-1.71241				1.58894	no	FVEG_03382	FOXG_04753	FCIRG_03328T1	FGSG_17664	neha_12687
FFUJ_06748		3	Zn(2)-C6 fungal-type DNA-binding domain	uncharacterized protein	-5.85061				6.59316	no	FVEG_12607	FOXG_04750	FCIRG_03326T1	FGSG_08080	neha_06458
FFUJ_06779		1	Zn(2)-C6 fungal-type DNA-binding domain	uncharacterized protein	-1.69239	-1.27034	-2.24365		-1.31752	unclear	FVEG_03356	FOXG_04783	FCIRG_02668T1	FGSG_15997	neha_15095
FFUJ_06813		3	Zn(2)-C6 fungal-type DNA-binding domain	uncharacterized protein					-1.73123	no	FVEG_07521	FOXG_04608	FCIRG_02225T1	FGSG_15925	neha_01665
FFUJ_06822		2	Zn(2)-C6 fungal-type DNA-binding domain; Transcription factor, fungi	related to C6 transcription factor					-1.22592	no	FVEG_14077	FOXG_10848	FCIRG_14024T1	FGSG_04803	neha_02097
FFUJ_06825		1	Zn(2)-C6 fungal-type DNA-binding domain; Transcription factor, fungi	related to Zn(II)Cys6 transcriptional activator					-1.25636	no	FVEG_03320	FOXG_04822	FCIRG_07091T1	FGSG_00052	neha_15409
FFUJ_06862		4	Zn(2)-C6 fungal-type DNA-binding domain; Transcription factor, fungi	uncharacterized protein	1.10775	1.36818	-1.35901			unclear	FVEG_02662	FOXG_04846	FCIRG_00686T1	FGSG_17297	neha_12217
FFUJ_06863		1	Zn(2)-C6 fungal-type DNA-binding domain; Transcription factor, fungi	uncharacterized protein	-1.15336		-1.77104		-1.30468	no	FVEG_03301	FOXG_04845	FCIRG_00685T1	FGSG_09075	neha_02784
FFUJ_06886		9	Zn(2)-C6 fungal-type DNA-binding domain	related to transcription activator amyR		1.13665				yes	FVEG_10011	FOXG_04867	FCIRG_01725T1	FGSG_10660	neha_10765
FFUJ_06901		2	Zn(2)-C6 fungal-type DNA-binding domain; Transcription factor, fungi	related to DAL81 - transcriptional activator for allantoin and GABA catabolic genes			-1.77358			no	FVEG_07526	FOXG_04407	FCIRG_01709T1	FGSG_17408	neha_02761
FFUJ_06914		0	Zn(2)-C6 fungal-type DNA-binding domain; Transcription factor, fungi	uncharacterized protein	1.84088	2.19761	1.15128			yes	FVEG_05647	FOXG_02462	FCIRG_04275T1	FGSG_06503	neha_15187
FFUJ_06935		1	Zinc finger, C2H2; Zinc finger, C2H2-type/integrase, DNA-binding	related to zinc finger protein	1.4474				-1.44977	no	FVEG_03239	FOXG_04904	FCIRG_14303T1	FGSG_17381	neha_09110
FFUJ_06949		2	Zn(2)-C6 fungal-type DNA-binding domain; Transcription factor, fungi	uncharacterized protein		1.05035				yes	FVEG_03225	FOXG_04916	FCIRG_11227T1	FGSG_17377	neha_10920
FFUJ_06964		1	Transcription factor, fungi	related to DAL81 - transcriptional activator for allantoin and GABA catabolic genes	1.05198		1.31529		-1.17774	no	FVEG_04074	FOXG_06221	FCIRG_01403T1	FGSG_17229	neha_03586
FFUJ_07000		1	Zn(2)-C6 fungal-type DNA-binding domain; Protein of unknown function DUF3468	uncharacterized protein			1.60475			no	FVEG_03175	FOXG_07533	FCIRG_01861T1	FGSG_17370	neha_14399
FFUJ_07002		2	Zinc finger, C2H2; Zinc finger, C2H2-type/integrase, DNA-binding; Zinc finger, C2H2-like	uncharacterized protein			1.09069		2.37413	no	FVEG_00106	FOXG_12876	FCIRG_01858T1	FGSG_10470	neha_02464
FFUJ_07008		6	Zn(2)-C6 fungal-type DNA-binding domain; Transcription factor, fungi	related to transcriptional activator CMR1	-1.58137	-2.39783	-2.23523		-1.30532	unclear	FVEG_03169	FOXG_04965	FCIRG_01853T1	FGSG_10429	neha_14413
FFUJ_07226		3	Zn(2)-C6 fungal-type DNA-binding domain	uncharacterized protein	-2.32525	-2.15847	-2.15709		2.49804	unclear	FVEG_02949	FOXG_05184	FCIRG_03433T1	FGSG_17335	neha_12143
FFUJ_07273		3	Helix-turn-helix type 3; Lambda repressor-like, DNA-binding; Multiprotein bridging factor 1, N-terminal	probable multiprotein bridging factor MBF1		1.01895				yes	FVEG_02904	FOXG_05229	FCIRG_02073T1	FGSG_10179	neha_12305
FFUJ_07290		1	Zinc finger, C2H2; Zinc finger, C2H2-type/integrase, DNA-binding; Zinc finger, C2H2-like	uncharacterized protein					1.49711	no	FVEG_02886	FOXG_05246	FCIRG_07094T1	FGSG_17323	neha_12322
FFUJ_07444		2	Zinc finger, C2H2; Transcription factor, fungi; Zinc finger, C2H2-type/integrase, DNA-binding; Zinc finger, C2H2-like	related to C2H2 zinc finger protein		-1.02348			-1.10669	yes	FVEG_02726	FOXG_05405	FCIRG_09980T1	FGSG_17301	neha_12099
FFUJ_07449		3	Zn(2)-C6 fungal-type DNA-binding domain	uncharacterized protein					-1.0371	no	FVEG_02723	FOXG_05408	FCIRG_11054T1	FGSG_17309	neha_12266
FFUJ_07458		0	Zinc finger, CCHC-type; Zinc finger, CCHC retroviral-type	uncharacterized protein			2.00577		1.44415	no	FVEG_13112	FOXG_05416	FCIRG_06457T1	FGSG_12977	neha_08322
FFUJ_07541		3	Zn(2)-C6 fungal-type DNA-binding domain; Transcription factor, fungi	probable transcription activator protein acu-15	-1.45397		-1.39293		-1.13004	no	FVEG_02639	FOXG_05502	FCIRG_03830T1	FGSG_09921	neha_12194
FFUJ_07577		7	Zn(2)-C6 fungal-type DNA-binding domain; Transcription factor, fungi	related to Zn(II)2Cys6 transcriptional activator	-1.98316	-1.72867	-1.5733			unclear	FVEG_02599	FOXG_05541	FCIRG_08810T1	FGSG_09884	neha_12067
FFUJ_07653		3	Transcription factor Jun; Basic-leucine zipper (bZIP) transcription factor; bZIP transcription factor, bZIP-1	uncharacterized protein	-2.48951	-2.55686				yes	FVEG_08944	FOXG_10295	FCIRG_06299T1	FGSG_02750	neha_11655
FFUJ_07657		0	Zinc finger, C2H2; Transcription factor, fungi; Zinc finger, C2H2-type/integrase, DNA-binding; Zinc finger, C2H2-like	related to DNA-binding protein					-2.32092	no	FVEG_08948	FOXG_10299	FCIRG_06294T1	FGSG_02743	neha_05777
FFUJ_07714		1	Zn(2)-C6 fungal-type DNA-binding domain; Transcription factor, fungi	uncharacterized protein	2.99553		-1.00932		-2.81116	no	FVEG_09007	FOXG_10355	FCIRG_07947T1	FGSG_02696	neha_05713
FFUJ_07906		1	Helix-loop-helix DNA-binding	related to helix-loop-helix protein	1.73889		2.27761			no	FVEG_09192	FOXG_10545	FCIRG_09860T1	FGSG_02516	neha_05945
FFUJ_07927		2	SANT domain, DNA binding; Homeodomain-like; Homeodomain-related; MYB-like	uncharacterized protein	1.50985		1.536			no	FVEG_09213	FOXG_10566	FCIRG_04119T1	FGSG_02538	neha_05925
FFUJ_07987		0	Zinc finger, CCHC-type; Zinc finger, CCHC retroviral-type	related to hexamer-binding protein HEXBP		1.09028				yes	FVEG_09277	FOXG_10630	FCIRG_04083T1	FGSG_02646	neha_12330
FFUJ_08011		1	Zn(2)-C6 fungal-type DNA-binding domain; Transcription factor, fungi	uncharacterized protein			-1.19448			no	FVEG_09303	FOXG_10655	FCIRG_11985T1	FGSG_15995	neha_06075
FFUJ_08022		11	Zn(2)-C6 fungal-type DNA-binding domain; Transcription factor, fungi	uncharacterized protein					-1.28472	no	FVEG_09315	FOXG_10665	FCIRG_05353T1	FGSG_03783	neha_08715
FFUJ_08048		1	Zinc finger, U1-type; Zinc finger, C2H2; Zinc finger, C2H2-like; Zinc finger, double-stranded RNA binding	related to zinc finger protein	-3.9382	-2.05535	-2.00852		1.5245	unclear	FVEG_06014	FOXG_02256	FCIRG_12306T1	FGSG_17465	neha_02880
FFUJ_08069		3	Zn(2)-C6 fungal-type DNA-binding domain	uncharacterized protein	-3.10561	-2.19366	-1.58503			yes	FVEG_11793	FOXG_03903	FCIRG_13287T1	FGSG_02268	neha_02639
FFUJ_08078		1	Zn(2)-C6 fungal-type DNA-binding domain	related to ARO80 - positive transcription regulator of ARO9 and ARO10	-1.98837	-1.18537	-1.73244		-2.41266	unclear	FVEG_10296	FOXG_11527	FCIRG_02818T1	FGSG_04109	neha_07109
FFUJ_08082		3	Transcription factor, fungi	related to fungal specific transcription factor	-4.53776	-3.45558			-2.54177	yes	FVEG_11806	FOXG_13053	FCIRG_02822T1	FGSG_16711	neha_10518
FFUJ_08107		2	Zn(2)-C6 fungal-type DNA-binding domain; Transcription factor, fungi	related to transcription activator protein acu-15			-2.22904		-1.21618	no	FVEG_12606	FOXG_01595	FCIRG_09986T2	FGSG_17723	neha_12257
FFUJ_08120		6	Zn(2)-C6 fungal-type DNA-binding domain	uncharacterized protein			-1.04017		-1.14228	no	FVEG_11753	FOXG_00942	FCIRG_11552T1	FGSG_16867	neha_13892
FFUJ_08173		1	Transcription factor, fungi	uncharacterized protein	-1.02592	-1.01868	-2.43254		-1.42537	unclear	FVEG_11710	FOXG_12950	FCIRG_14724T1	FGSG_11051	neha_12257
FFUJ_08176		2	Zn(2)-C6 fungal-type DNA-binding domain; Transcription factor, fungi	related to nitrate assimilation regulatory protein nirA	1.46042	1.98101				yes	FVEG_11707	FOXG_12946	FCIRG_09214T1	FGSG_05925	neha_01535
FFUJ_08254		2	Zn(2)-C6 fungal-type DNA-binding domain	uncharacterized protein	1.94732	1.91692				yes	FVEG_11621	FOXG_12872	FCIRG_12407T1	FGSG_17497	neha_01065
FFUJ_08283		1	Zn(2)-C6 fungal-type DNA-binding domain; Transcription factor, fungi	related transcriptional activator			-1.1989			no	FVEG_11594	FOXG_12849	FCIRG_12802T1	FGSG_10914	neha_01098
FFUJ_08314		2	Methylated-DNA-[protein]-cysteine S-methyltransferase, active site; Winged helix-turn-helix transcription repressor DNA-binding; Methylated-DNA-[protein]-cysteine S-methyltransferase, DNA binding	related to methylated-DNA--protein-cysteine methyltransferase		1.97608			2.64981	yes	FVEG_11562	FOXG_12820	FCIRG_13736T1	FGSG_17503	neha_01135
FFUJ_08331		2	Heat shock factor (HSF)-type, DNA-binding; Winged helix-turn-helix transcription repressor DNA-binding	related to heat shock transcription factor HSF21					-1.30964	no	FVEG_11544	FOXG_12803	FCIRG_00217T1	FGSG_10868	neha_01151
FFUJ_08392		3	Zn(2)-C6 fungal-type DNA-binding domain	related to C6 zink-finger protein PRO1A	-1.06926		-1.09803			no	FVEG_11483	FOXG_12744	FCIRG_13904T1	FGSG_17514	neha_01206
FFUJ_08424		4	Zn(2)-C6 fungal-type DNA-binding domain	uncharacterized protein	1.36138				-1.12425	no	FVEG_11448	FOXG_12709	FCIRG_02926T1	FGSG_13920	neha_01238
FFUJ_08525		3	Zinc finger, C2H2; Transcription factor, fungi; Zinc finger, C2H2-type/integrase, DNA-binding; Zinc finger, C2H2-like	related to DNA-binding protein			-1.15867			no	FVEG_07130	FOXG_09505	FCIRG_00457T1	FGSG_05399	neha_00421
FFUJ_08604		5	Zn(2)-C6 fungal-type DNA-binding domain; Transcription factor, fungi	related to Zn(II)2Cys6 transcriptional activator	-1.45818				1.52444	no	FVEG_07057	FOXG_09425	FCIRG_12180T1	FGSG_12742	neha_00343
FFUJ_08606		1	Homeobox; Rhodanese-like; Homeodomain-like; Homeodomain-related	uncharacterized protein					-1.03718	no	FVEG_07053	FOXG_09421	FCIRG_04269T1	FGSG_16490	neha_00341
FFUJ_08655		7	Cullin, N-terminal; Winged helix-turn-helix transcription repressor DNA-binding; Cullin homology; Cullin repeat-like-containing domain; Cullin protein, neddylation domain	related to cullin homolog 4A					-2.27935	no	FVEG_06976	FOXG_09372	FCIRG_09442T1	FGSG_05520	neha_00299
FFUJ_08721		2	Zn(2)-C6 fungal-type DNA-binding domain; Transcription factor, fungi	uncharacterized protein	1.36619	5.35098	1.81052		1.36836	yes	FVEG_12982	FOXG_17625	FCIRG_04784T1	FGSG_16506	neha_00232
FFUJ_08782		4	Zn(2)-C6 fungal-type DNA-binding domain; Transcription factor, fungi	uncharacterized protein					1.88496	no	FVEG_06840	FOXG_09390	FCIRG_06958T1	FGSG_05646	neha_00167
FFUJ_08807		6	Zinc finger, ZZ-type; SANT domain, DNA binding; SWIRM; Homeodomain-like; Homeodomain-related; Myb, DNA-binding; Transcriptional adaptor 2; SANT, eukarya	related to transcription adaptor ADA2	-1.00088		-1.17729			no	FVEG_06817	FOXG_09215	FCIRG_09724T1	FGSG_16521	neha_00142
FFUJ_08815		4	Zn(2)-C6 fungal-type DNA-binding domain	related to cercosporin resistance protein	-1.37354				1.58984	no	FVEG_06809	FOXG_09207	FCIRG_01002T1	FGSG_16522	neha_00134
FFUJ_08822		5	Transcription factor, fungi	uncharacterized protein	-1.77448		-1.78502		1.81368	no	FVEG_03587	FOXG_09200	FCIRG_00995T1	FGSG_04901	neha_00124
FFUJ_08827		7	Zn(2)-C6 fungal-type DNA-binding domain	uncharacterized protein	-5.96688	-5.93105			-1.10603	yes	FVEG_06798	FOXG_09195	FCIRG_00990T1	FGSG_05682	neha_00113
FFUJ_08862		1	Zn(2)-C6 fungal-type DNA-binding domain; Transcription factor, fungi	uncharacterized protein	-1.51389		-1.18045			no	FVEG_06759	FOXG_09161	FCIRG_02098T1	FGSG_09147	neha_02525
FFUJ_08882		1	Zn(2)-C6 fungal-type DNA-binding domain; Zinc finger, C2H2; Zinc finger, C2H2-type/integrase, DNA-binding; Zinc finger, C2H2-like	related to transcription factor Pig1p	-1.96537	-1.15693	-1.88273			unclear	FVEG_06741	FOXG_09141	FCIRG_01695T1	FGSG_16446	neha_00078
FFUJ_08895		2	Transcription factor, fungi	related to transcriptional activator acu-15		-3.2056			-1.39517	yes	FVEG_13272	FOXG_09126	FCIRG_12984T1	FGSG_16414	neha_02357
FFUJ_09074		1	Zinc finger, C2H2; Zinc finger, C2H2-type/integrase, DNA-binding; Zinc finger, C2H2-like	related to zinc finger protein odd-paired-like (opl)	5.48681	4.14351	3.99557		-2.52661	unclear	FVEG_09661	FOXG_11128	FCIRG_13294T1	FGSG_01576	neha_02370
FFUJ_09077		13	Zinc finger, C2H2; Zinc finger, C2H2-like	related to zinc finger protein odd-paired-like (opl)	5.95052	6.36805			-7.13502	yes	FVEG_09661	FOXG_11128	FCIRG_13294T1	FGSG_01576	neha_14901
FFUJ_09093		3	Homeobox; Zinc finger, C2H2; Homeobox KN domain; Homeodomain-like; Homeodomain-related; Zinc finger, C2H2-like	related to monocarboxylate transporter 4					-1.0122	no	FVEG_06579	FOXG_06267	FCIRG_01540T1	FGSG_17150	neha_02344
FFUJ_09124		0	Zn(2)-C6 fungal-type DNA-binding domain; Transcription factor, fungi	related to nitrate assimilation regulatory protein nirA	-2.61727	-2.28271				yes	FVEG_06536	FOXG_08918	FCIRG_02253T1	FGSG_09064	neha_02273
FFUJ_09127		4	Zn(2)-C6 fungal-type DNA-binding domain; Transcription factor, fungi	related to STB5 - SIN3 binding protein		1.11888				yes	FVEG_06537	FOXG_08921	FCIRG_02252T1	FGSG_09065	neha_02285
FFUJ_09139		0	Zn(2)-C6 fungal-type DNA-binding domain	uncharacterized protein	-4.3345	-1.15304	-1.10736		1.21402	unclear	FVEG_06526	FOXG_08737	FCIRG_05726T1	FGSG_16472	neha_09244
FFUJ_09161		2	Zn(2)-C6 fungal-type DNA-binding domain; Transcription factor, fungi	related to lactose regulatory protein			1.43231			no	FVEG_06510	FOXG_08883	FCIRG_13879T1	FGSG_16075	neha_15220
FFUJ_09177	DMATS1-TF	0	Zn(2)-C6 fungal-type DNA-binding domain; Transcription factor, fungi	uncharacterized protein	-1.09981		-1.40494			no	FVEG_13150	FOXG_11875	FCIRG_01607T1	FGSG_17423	neha_07548
FFUJ_09190		4	Zn(2)-C6 fungal-type DNA-binding domain; Transcription factor, fungi	related to STB5 - SIN3 binding protein	-8.06393	-8.19066	1.09388			unclear	FVEG_10037	FOXG_11774	FCIRG_12216T1	FGSG_09065	neha_09287
FFUJ_09194		1	Zn(2)-C6 fungal-type DNA-binding domain; Transcription factor, fungi	related to pathway-specific regulatory protein nit-4			-1.01917			no	FVEG_10041	FOXG_11778	FCIRG_14959T1	FGSG_03929	neha_14089
FFUJ_09228		1	Zn(2)-C6 fungal-type DNA-binding domain; Transcription factor, fungi	related to Put3p and to hypothetical protein YJL206c			-1.0424		-1.04242	no	FVEG_10020	FOXG_11805	FCIRG_11521T1	FGSG_10639	neha_15220
FFUJ_09231		3	Zn(2)-C6 fungal-type DNA-binding domain; Aflatoxin biosynthesis regulatory protein	uncharacterized protein	-2.7078	-2.0318	-1.41149			yes	FVEG_10018	FOXG_11808	FCIRG_13524T1	FGSG_16274	neha_09524
FFUJ_09239		1	Zn(2)-C6 fungal-type DNA-binding domain; Transcription factor, fungi	related to transcription activator amyR	-1.12408	-1.63565	-1.03082			yes	FVEG_10011	FOXG_11816	FCIRG_05933T1	FGSG_03892	neha_07734
FFUJ_09258		3	Zn(2)-C6 fungal-type DNA-binding domain; Transcription factor, fungi	uncharacterized protein	-2.65057	-1.26095	-2.90909			unclear	FVEG_08621	FOXG_09864	FCIRG_11337T1	FGSG_16288	neha_07037
FFUJ_09271		6	Zn(2)-C6 fungal-type DNA-binding domain	related to regulatory protein alcR	-2.71644		-1.80185			no	FVEG_10005	FOXG_10302	FCIRG_05922T1	FGSG_07482	neha_09752
FFUJ_09298	Bea4	19	Zn(2)-C6 fungal-type DNA-binding domain	beauvericin cluster - transcription factor	-3.41532	-1.754				yes	FVEG_09991	FOXG_11849	FCIRG_09913T1	FGSG_11321	neha_15323
FFUJ_09309		0	Zn(2)-C6 fungal-type DNA-binding domain; Transcription factor, fungi	related to transcriptional activator Mut3p	1.88555				-1.60524	no	FVEG_10028	FOXG_11767	FCIRG_07666T1	FGSG_03924	neha_08379
FFUJ_09328		3	Zn(2)-C6 fungal-type DNA-binding domain; Protein of unknown function DUF3468	uncharacterized protein		-1.49631			-1.50841	yes	FVEG_10069	FOXG_11743	FCIRG_07549T1	FGSG_03912	neha_09262
FFUJ_09360		2	Zn(2)-C6 fungal-type DNA-binding domain; Transcription factor, fungi	related to positive transcriptional regulator for purine utilization	-1.88886	-1.70978	-1.29484			yes	FVEG_10126	FOXG_11711	FCIRG_02799T1	FGSG_11124	neha_09322
FFUJ_09363		3	Basic-leucine zipper (bZIP) transcription factor; Protein of unknown function DUF3425	uncharacterized protein	-1.23294	-1.42273	-1.11632			yes	FVEG_10107	FOXG_11708	FCIRG_04344T1	FGSG_12345	neha_09283
FFUJ_09460		0	Helix-loop-helix DNA-binding	uncharacterized protein	-2.29356	2.60309	-1.60693		3.97039	unclear	FVEG_10201	FOXG_11619	FCIRG_13377T1	FGSG_04035	neha_09652
FFUJ_09518		1	O-methyltransferase, family 2; Winged helix-turn-helix transcription repressor DNA-binding; O-methyltransferase, COMT, eukaryota	related to O-methyltransferase B	1.14768		1.02493			no	FVEG_10263	FOXG_11561	FCIRG_04383T1	FGSG_03568	neha_09716
FFUJ_09616		9	Zn(2)-C6 fungal-type DNA-binding domain; Transcription factor, fungi	uncharacterized protein		1.68288				yes	FVEG_10357	FOXG_11463	FCIRG_13011T1	FGSG_04170	neha_05575
FFUJ_09655		0	Zn(2)-C6 fungal-type DNA-binding domain	uncharacterized protein	-1.63906		-2.16322		1.29836	no	FVEG_10397	FOXG_11424	FCIRG_00068T1	FGSG_12290	neha_05533
FFUJ_09660		3	Negative transcriptional regulator; FMN-binding split barrel-related; FMN-binding split barrel	probable transcriptional regulator	2.22088	4.78357	2.53906		2.57238	yes	FVEG_10401	FOXG_11420	FCIRG_13395T1	FGSG_04209	neha_05524
FFUJ_09671		4	Ankyrin repeat; Transcription regulator HTH, APSES-type DNA-binding domain; KilA, N-terminal/APSES-type HTH, DNA-binding; Ankyrin repeat-containing domain	related to transcription factor			-1.44532			no	FVEG_10410	FOXG_11409	FCIRG_11683T1	FGSG_04220	neha_05510
FFUJ_09672		3	Zinc finger, FYVE-type; Zinc finger, Rad18-type putative; Zinc finger, FYVE/PHD-type; Zinc finger, RING/FYVE/PHD-type; Zinc finger, FYVE-related	related to vacuolar segregation protein PEP7			-1.02177			no	FVEG_10411	FOXG_11408	FCIRG_03450T1	FGSG_04221	neha_05509
FFUJ_09725		1	Zn(2)-C6 fungal-type DNA-binding domain	probable lactose regulatory protein		-1.30421				yes	FVEG_10459	FOXG_11357	FCIRG_02324T1	FGSG_12282	neha_05448
FFUJ_09747		1	Zinc finger, C2H2; Zinc finger, C2H2-like	related to 26S proteasome subunit RPN4	4.08993	2.6506	4.69806			unclear	FVEG_11376	FOXG_13954	FCIRG_11215T1	FGSG_04288	neha_00520
FFUJ_09771		4	Zn(2)-C6 fungal-type DNA-binding domain	uncharacterized protein	-1.85121				1.19604	no	FVEG_11353	FOXG_13929	FCIRG_03923T1	FGSG_04311	neha_00545
FFUJ_09777		2	Zn(2)-C6 fungal-type DNA-binding domain	uncharacterized protein			-1.18775		-1.06191	no	FVEG_12827	FOXG_16802	FCIRG_07845T1	FGSG_16127	neha_00551
FFUJ_09949		8	Zn(2)-C6 fungal-type DNA-binding domain	uncharacterized protein	-1.25504	-1.11958				yes	FVEG_11185	FOXG_13751	FCIRG_06974T1	FGSG_04459	neha_00752
FFUJ_09966		3	Zn(2)-C6 fungal-type DNA-binding domain	uncharacterized protein			1.28716			no	FVEG_11163	FOXG_13734	FCIRG_11979T1	FGSG_04480	neha_00768
FFUJ_09985		9	Transcription factor, fungi	uncharacterized protein		2.63493			1.57448	yes	FVEG_09816	FOXG_10985	FCIRG_14971T1	FGSG_04496	neha_03225
FFUJ_09986		5	SANT domain, DNA binding; Homeodomain-like; Homeodomain-related; Myb, DNA-binding; Myb transcription factor; Transcription regulator HTH, Myb-type, DNA-binding	probable BAS1 - transcription factor			-1.0952			no	FVEG_11146	FOXG_13711	FCIRG_14972T1	FGSG_16102	neha_00799
FFUJ_10009		3	Zn(2)-C6 fungal-type DNA-binding domain	uncharacterized protein	2.16385	3.71818	1.44369			yes	FVEG_13179	FOXG_15695	FCIRG_07336T1	FGSG_06442	neha_00858
FFUJ_10019		3	Zn(2)-C6 fungal-type DNA-binding domain	uncharacterized protein			-1.03296			no	FVEG_11116	FOXG_13684	FCIRG_03056T1	FGSG_16090	neha_15133
FFUJ_10046		3	Zn(2)-C6 fungal-type DNA-binding domain	uncharacterized protein	3.42401	-3.47303	-3.19892		-7.9104	unclear	FVEG_11090	FOXG_13654	FCIRG_13357T1	FGSG_04581	neha_00811
FFUJ_10067		1	Zn(2)-C6 fungal-type DNA-binding domain	uncharacterized protein		1.35095	1.07388			yes	FVEG_12058	FOXG_13643	FCIRG_01833T1	FGSG_01760	neha_07667
FFUJ_10105		3	Zn(2)-C6 fungal-type DNA-binding domain	uncharacterized protein			-1.1401			no	FVEG_11040	FOXG_13616	FCIRG_07923T1	FGSG_04629	neha_00876
FFUJ_10119		3	Zn(2)-C6 fungal-type DNA-binding domain	uncharacterized protein	-2.06559	-3.72687			-1.96325	yes	FVEG_02219	FOXG_03347	FCIRG_06167T1	FGSG_13344	neha_09820
FFUJ_10137		1	Zn(2)-C6 fungal-type DNA-binding domain; Transcription factor, fungi	uncharacterized protein	-3.65556		-2.12084			no	FVEG_11027	FOXG_13596	FCIRG_00102T1	FGSG_04643	neha_07481
FFUJ_10199		5	Zinc finger, C2H2; Transcription factor, fungi; Zinc finger, C2H2-type/integrase, DNA-binding; Zinc finger, C2H2-like	related to C2H2 zinc finger protein	-4.25385	-5.20673			-4.68891	yes	FVEG_11007	FOXG_17380	FCIRG_00065T1	FGSG_09770	neha_11859
FFUJ_10201		0	Zinc finger, C2H2; Zinc finger, C2H2-like	uncharacterized protein		2.64268				yes	FVEG_03490	FOXG_05641	FCIRG_02396T1	FGSG_16306	neha_01946
FFUJ_10229		2	Zn(2)-C6 fungal-type DNA-binding domain	uncharacterized protein					-1.03827	no	FVEG_11575	FOXG_12831	FCIRG_11582T1	FGSG_03857	neha_15365
FFUJ_10253		6	Transcription factor, fungi	uncharacterized protein	-2.57887	-3.14118				yes	FVEG_13797	FOXG_07973	FCIRG_03563T1	FGSG_02787	neha_11721
FFUJ_10263		2	Zn(2)-C6 fungal-type DNA-binding domain; Zinc finger, C2H2; Transcription factor, fungi; Zinc finger, C2H2-type/integrase, DNA-binding; Zinc finger, C2H2-like	uncharacterized protein	-4.7118		-3.19326			no	FVEG_13150	FOXG_15687	FCIRG_01607T1	FGSG_17423	neha_07548
FFUJ_10274		5	Zn(2)-C6 fungal-type DNA-binding domain; Transcription factor, fungi	related to transcription activator protein acu-15			-1.39624			no	FVEG_08366	FOXG_10147	FCIRG_00515T1	FGSG_16321	neha_11210
FFUJ_10316		2	Zn(2)-C6 fungal-type DNA-binding domain	uncharacterized protein			1.19875			no	FVEG_13737	FOXG_16486	FCIRG_02769T1	FGSG_03508	neha_09090
FFUJ_10349		0	Zn(2)-C6 fungal-type DNA-binding domain	uncharacterized protein			-1.44061		-1.38629	no	FVEG_06798	FOXG_16517	FCIRG_06603T1	FGSG_16256	neha_02755
FFUJ_10379		2	Zn(2)-C6 fungal-type DNA-binding domain	uncharacterized protein			-1.86823			no	FVEG_13681	FOXG_16556	FCIRG_04245T1	FGSG_03485	neha_11883
FFUJ_10394		4	Zn(2)-C6 fungal-type DNA-binding domain; Transcription factor, fungi	uncharacterized protein		-1.86121			-1.08446	yes	FVEG_01423	FOXG_16570	FCIRG_04261T1	FGSG_00052	neha_09229
FFUJ_10457		0	Alcohol dehydrogenase, iron-type; Transcription factor, fungi	related to nitrate assimilation regulatory protein nirA			-1.78587			no	FVEG_02398	FOXG_16637	FCIRG_14099T1	FGSG_16284	neha_02697
FFUJ_10471		13	Zn(2)-C6 fungal-type DNA-binding domain; Transcription factor, fungi	related to binuclear zinc cluster transcription factor that regulates the ratio between aurofusarin and rubrofusarin biosynthesis			-1.0819		-1.539	no	FVEG_13591	FOXG_16650	FCIRG_14163T1	FGSG_16250	neha_02668
FFUJ_10487		0	Zn(2)-C6 fungal-type DNA-binding domain; Transcription factor, fungi	uncharacterized protein	1.10216				-1.38459	no	FVEG_13797	FOXG_07973	FCIRG_00880T1	FGSG_03559	neha_07451
FFUJ_10495		3	Zn(2)-C6 fungal-type DNA-binding domain; Transcription factor, fungi	related to pathway-specific regulatory protein nit-4	4.48032	2.15093	2.47959		-1.10413	unclear	FVEG_14095	FOXG_09549	FCIRG_00888T1	FGSG_16245	neha_00797
FFUJ_10507		2	Zn(2)-C6 fungal-type DNA-binding domain	uncharacterized protein	1.29467	2.15826				yes	FVEG_08787	FOXG_09560	FCIRG_00902T1	FGSG_16240	neha_15489
FFUJ_10536		6	Zn(2)-C6 fungal-type DNA-binding domain	uncharacterized protein			-1.38447		-1.01816	no	FVEG_11740	FOXG_11913	FCIRG_10610T1	FGSG_07604	neha_00947
FFUJ_10558		0	Regulator of G protein signalling; DEP domain; Winged helix-turn-helix transcription repressor DNA-binding; Regulator of G protein signalling superfamily	probable developmental regulator flbA	-2.519				1.96475	no	FVEG_08855	FOXG_09613	FCIRG_00495T1	FGSG_03597	neha_07412
FFUJ_10570		1	Transcription factor, fungi	related to C6 transcription factor		1.32257				yes	FVEG_08843	FOXG_09623	FCIRG_00507T1	FGSG_16237	neha_09847
FFUJ_10616		1	Transcription factor, fungi	uncharacterized protein		1.30715				yes	FVEG_08805	FOXG_09665	FCIRG_07806T1	FGSG_16228	neha_11869
FFUJ_10657		3	Zn(2)-C6 fungal-type DNA-binding domain; Transcription factor, fungi	related to transcriptional activator Mut3p			-2.25258		-1.52027	no	FVEG_08771	FOXG_09701	FCIRG_10468T1	FGSG_12398	neha_07468
FFUJ_10660		2	Zn(2)-C6 fungal-type DNA-binding domain	related to cercosporin resistance protein		-3.2384	-2.03468		-2.23542	yes	FVEG_08768	FOXG_09704	FCIRG_12454T1	FGSG_16226	neha_09394
FFUJ_10669		1	Zn(2)-C6 fungal-type DNA-binding domain; Transcription factor, fungi	related to transcriptional activator Mut3p					-1.39561	no	FVEG_09299	FOXG_09712	FCIRG_02663T1	FGSG_16922	neha_07250
FFUJ_10713		7	Zn(2)-C6 fungal-type DNA-binding domain; Transcription factor, fungi	related to STB5 - transcription factor	-2.41203		-2.20949			no	FVEG_08719	FOXG_09762	FCIRG_11296T1	FGSG_03727	neha_07481
FFUJ_10748		3	Helix-loop-helix DNA-binding	uncharacterized protein		-1.18797	1.54255			unclear	FVEG_08684	FOXG_00250	FCIRG_01927T1	FGSG_16295	neha_05614
FFUJ_10784		2	Zn(2)-C6 fungal-type DNA-binding domain; Transcription factor, fungi	related to nitrate assimilation regulatory protein nirA		-1.07902	-1.91619			unclear	FVEG_08651	FOXG_13265	FCIRG_14994T1	FGSG_11654	neha_13711
FFUJ_10792		1	Zn(2)-C6 fungal-type DNA-binding domain	uncharacterized protein	1.50536		1.13136		-1.41609	no	FVEG_08644	FOXG_09835	FCIRG_04101T1	FGSG_16292	neha_11288
FFUJ_10840		1	Zn(2)-C6 fungal-type DNA-binding domain; Transcription factor, fungi	related to transcription activator protein acu-15		-1.8457			-1.33203	yes	FVEG_12838	FOXG_05433	FCIRG_07389T1	FGSG_12385	neha_01823
FFUJ_10864		1	Zn(2)-C6 fungal-type DNA-binding domain; Transcription factor, fungi	uncharacterized protein		-1.9597			-2.07662	yes	FVEG_08579	FOXG_09926	FCIRG_05917T1	FGSG_03292	neha_02440
FFUJ_10866		3	Zn(2)-C6 fungal-type DNA-binding domain; Aflatoxin biosynthesis regulatory protein; Transcription factor, fungi	uncharacterized protein		1.55359				yes	FVEG_08576	FOXG_09928	FCIRG_05919T1	FGSG_03294	neha_15609
FFUJ_10867		3	Zn(2)-C6 fungal-type DNA-binding domain	uncharacterized protein	1.36118	5.08756	1.99523			yes	FVEG_07971	FOXG_01610	FCIRG_14021T1	FGSG_07192	neha_13324
FFUJ_10874		0	Zinc finger, GATA-type; Zinc finger, NHR/GATA-type	uncharacterized protein		-1.05505				yes	FVEG_08570	FOXG_09938	FCIRG_02856T1	FGSG_03281	neha_12009
FFUJ_10875		2	Zinc finger, GATA-type; Tetratricopeptide-like helical; Tetratricopeptide repeat-containing; Zinc finger, NHR/GATA-type; Tetratricopeptide repeat	uncharacterized protein	1.55271	-1.56062	-1.29218		-2.74879	yes	FVEG_08568	FOXG_09940	FCIRG_02855T1	FGSG_12472	neha_07315
FFUJ_10899		9	Zn(2)-C6 fungal-type DNA-binding domain; Protein of unknown function DUF3468	related to fungal transcriptional regulatory protein					-6.63862	no	FVEG_08546	FOXG_09965	FCIRG_02154T1	FGSG_05279	neha_02610
FFUJ_10926		2	Zinc finger, C2H2; Zinc finger, C2H2-like	uncharacterized protein	3.0189	4.02842	2.51813			yes	FVEG_08522	FOXG_09985	FCIRG_02396T1	FGSG_16306	neha_01946
FFUJ_10935		4	Zn(2)-C6 fungal-type DNA-binding domain; Transcription factor, fungi	related to Zn(II)2Cys6 transcriptional activator	1.21487	1.61267			-1.20945	yes	FVEG_08515	FOXG_09999	FCIRG_02403T1	FGSG_03246	neha_08954
FFUJ_10963		0	Zn(2)-C6 fungal-type DNA-binding domain; Transcription factor, fungi	related to cutinase transcription factor 1 beta	1.78388	2.01562			-2.00508	yes	FVEG_00228	FOXG_04196	FCIRG_13492T1	FGSG_00227	neha_12669
FFUJ_10976		0	Zn(2)-C6 fungal-type DNA-binding domain; Protein of unknown function DUF3468	related to ARG81 - transcription factor involved in arginine metabolism		-1.15406	1.29447			unclear	FVEG_08468	FOXG_10036	FCIRG_12534T1	FGSG_03214	neha_02021
FFUJ_10980		0	Zn(2)-C6 fungal-type DNA-binding domain	uncharacterized protein		1.91792				yes	FVEG_08472	FOXG_10032	FCIRG_09152T1	FGSG_03219	neha_07215
FFUJ_10999		3	Zn(2)-C6 fungal-type DNA-binding domain; Transcription factor, fungi	uncharacterized protein			-1.59049			no	FVEG_08457	FOXG_10047	FCIRG_10778T1	FGSG_16308	neha_06427
FFUJ_11041		1	Zn(2)-C6 fungal-type DNA-binding domain	related to C6 finger domain protein		1.65484	-1.49968			unclear	FVEG_08418	FOXG_10076	FCIRG_04648T1	FGSG_16313	neha_02077
FFUJ_11049		0	Zn(2)-C6 fungal-type DNA-binding domain; NACHT nucleoside triphosphatase	uncharacterized protein					-1.39208	no	FVEG_01723	FOXG_10092	FCIRG_08665T1	FGSG_13978	neha_07715
FFUJ_11056		1	Zn(2)-C6 fungal-type DNA-binding domain	uncharacterized protein	-1.62734	-1.79092	-1.40569		-2.42034	yes	FVEG_08406	FOXG_11778	FCIRG_10134T1	FGSG_12597	neha_01665
FFUJ_11073		12	Zn(2)-C6 fungal-type DNA-binding domain	uncharacterized protein	-1.52177	-1.6453	-1.60693		-1.99214	unclear	FVEG_04998	FOXG_08076	FCIRG_11582T1	FGSG_06324	neha_15365
FFUJ_11102		0	Zn(2)-C6 fungal-type DNA-binding domain; Transcription factor, fungi	related to transcription activator protein acu-15	1.78183		-1.16833		-2.52125	no	FVEG_08366	FOXG_10147	FCIRG_00515T1	FGSG_16321	neha_11210
FFUJ_11115		2	Zn(2)-C6 fungal-type DNA-binding domain; Transcription factor, fungi	uncharacterized protein			-1.06971		-1.19729	no	FVEG_08358	FOXG_10156	FCIRG_02403T1	FGSG_10684	neha_08954
FFUJ_11117		2	Zn(2)-C6 fungal-type DNA-binding domain; Protein of unknown function DUF3468	uncharacterized protein	-1.18973	-2.66259	-1.00424		-2.06654	yes	FVEG_08360	FOXG_10154	FCIRG_02775T1	FGSG_03102	neha_09054
FFUJ_11125		8	Zn(2)-C6 fungal-type DNA-binding domain; Aflatoxin biosynthesis regulatory protein; Transcription factor, fungi	uncharacterized protein	2.24035				-1.78588	no	FVEG_01423	FOXG_09425	FCIRG_12180T1	FGSG_12742	neha_15280
FFUJ_11166		2	Zn(2)-C6 fungal-type DNA-binding domain	uncharacterized protein	1.02563	-2.38216	-1.38645		-3.77415	yes	FVEG_02154	FOXG_03282	FCIRG_05098T1	FGSG_06382	neha_09899
FFUJ_11173		2	Zn(2)-C6 fungal-type DNA-binding domain; Transcription factor, fungi	uncharacterized protein		1.25833				yes	FVEG_12635	FOXG_15317	FCIRG_05875T1	FGSG_16414	neha_15267
FFUJ_11179		2	Transcription factor, fungi	uncharacterized protein			-1.15585		-2.96082	no	FVEG_06741	FOXG_09141	FCIRG_01695T1	FGSG_16446	neha_06207
FFUJ_11180		0	Zn(2)-C6 fungal-type DNA-binding domain	uncharacterized protein					-2.04172	no	FVEG_08335	FOXG_02760	FCIRG_03481T1	FGSG_03102	neha_06009
FFUJ_11184		5	Zn(2)-C6 fungal-type DNA-binding domain	uncharacterized protein	-6.6535	-7.52672	-2.40875			yes	FVEG_08310	FOXG_10228	FCIRG_06827T1	FGSG_15925	neha_01665
FFUJ_11191		0	Zn(2)-C6 fungal-type DNA-binding domain; Transcription factor, fungi	related to C6 transcription factor	-2.53727		-1.64196		-2.15699	no	FVEG_14130	FOXG_03543	FCIRG_05312T1	FGSG_16959	neha_14695
FFUJ_11206	PKS16-TF	0	Zn(2)-C6 fungal-type DNA-binding domain; Transcription factor, fungi	related to transcription activator protein acu-15	-1.91906		-1.7362			no	FVEG_13074	FOXG_13278	FCIRG_02357T1	FGSG_05120	neha_00496
FFUJ_11221		3	Zinc finger, C2H2; Transcription factor, fungi; Zinc finger, C2H2-type/integrase, DNA-binding; Zinc finger, C2H2-like	uncharacterized protein		-1.14399				yes	FVEG_07130	FOXG_03048	FCIRG_11166T1	FGSG_08791	neha_12848
FFUJ_11226		8	Zn(2)-C6 fungal-type DNA-binding domain	uncharacterized protein					-3.70659	no	FVEG_13056	FOXG_17168	FCIRG_04177T1	FGSG_03857	neha_08770
FFUJ_11231		1	Zinc finger, C2H2	uncharacterized protein	-8.09578	-3.88433	-2.87374		3.90986	yes	FVEG_01655	FOXG_13289	FCIRG_12688T1	FGSG_08138	neha_07753
FFUJ_11236		2	Zn(2)-C6 fungal-type DNA-binding domain; Protein of unknown function DUF3425	uncharacterized protein	3.3774		1.75126		-3.28221	no	FVEG_03209	FOXG_04931	FCIRG_04186T1	FGSG_03861	neha_14360
FFUJ_11241		0	Zinc finger, C2H2; Transcription factor, fungi; Zinc finger, C2H2-type/integrase, DNA-binding; Zinc finger, C2H2-like	uncharacterized protein	-1.14126		-1.96263		-1.84176	no	FVEG_06741	FOXG_09141	FCIRG_01565T1	FGSG_17423	neha_00788
FFUJ_11250		0	Zn(2)-C6 fungal-type DNA-binding domain	uncharacterized protein			-1.66856		-1.75094	no	FVEG_01650	FOXG_03754	FCIRG_06311T1	FGSG_16927	neha_02477
FFUJ_11259		1	Zn(2)-C6 fungal-type DNA-binding domain	uncharacterized protein	1.99077				-2.1821	no	FVEG_03298	FOXG_17148	FCIRG_00687T1	FGSG_10576	neha_07233
FFUJ_11274		1	Zn(2)-C6 fungal-type DNA-binding domain	uncharacterized protein			-1.1292			no	FVEG_13302	FOXG_17135	FCIRG_13437T1	FGSG_03919	neha_03946
FFUJ_11293		0	Zinc finger, C2H2; Zinc finger, C2H2-like	related to TRI15 - putative transcription factor		4.56031			3.47118	yes	FVEG_13013	FOXG_16888	FCIRG_00807T1	FGSG_03881	neha_05625
FFUJ_11299		11	Zn(2)-C6 fungal-type DNA-binding domain	uncharacterized protein	-1.19783	-2.28503	-5.66352		-4.74159	unclear	FVEG_08644	FOXG_09835	FCIRG_06104T1	FGSG_16795	neha_15533
FFUJ_11305		5	Zn(2)-C6 fungal-type DNA-binding domain	related to Zn(II)2Cys6 transcriptional activator					1.2729	no	FVEG_12982	FOXG_17625	FCIRG_08589T1	FGSG_04683	neha_06458
FFUJ_11313		4	Zn(2)-C6 fungal-type DNA-binding domain	uncharacterized protein		1.1834				yes	FVEG_13179	FOXG_15695	FCIRG_11966T1	FGSG_03874	neha_02460
FFUJ_11321		3	Zn(2)-C6 fungal-type DNA-binding domain; Aflatoxin biosynthesis regulatory protein	uncharacterized protein	1.6926				-3.35392	no	FVEG_04253	FOXG_08863	FCIRG_11285T1	FGSG_03857	neha_15365
FFUJ_11334		1	Zn(2)-C6 fungal-type DNA-binding domain	uncharacterized protein			-1.82772		-3.25212	no	FVEG_02340	FOXG_05621	FCIRG_00990T1	FGSG_16159	neha_08684
FFUJ_11341		0	Zn(2)-C6 fungal-type DNA-binding domain	related to transcription activator amyR			-1.29688			no	FVEG_10011	FOXG_17624	FCIRG_08582T1	FGSG_00069	neha_10838
FFUJ_11351		0	Zn(2)-C6 fungal-type DNA-binding domain; Transcription factor, fungi	uncharacterized protein	1.53263				-3.12219	no	FVEG_12967	FOXG_16867	FCIRG_01295T1	FGSG_03786	neha_09435
FFUJ_11394		0	Copper fist DNA-binding	uncharacterized protein	6.04294	5.51135	1.4608		-1.11382	yes	FVEG_12927	FOXG_16876	FCIRG_08882T1	FGSG_06067	neha_01171
FFUJ_11427		1	Zinc finger, GATA-type; Zinc finger, NHR/GATA-type	uncharacterized protein		-2.68517			-1.47866	yes	FVEG_08570	FOXG_09938	FCIRG_02856T1	FGSG_03281	neha_14591
FFUJ_11484		0	Zn(2)-C6 fungal-type DNA-binding domain	related to quinate transport protein		-1.97129	-2.4815		-2.79155	unclear	FVEG_12844	FOXG_16848	FCIRG_08921T1	FGSG_16193	neha_08968
FFUJ_11491		2	Zn(2)-C6 fungal-type DNA-binding domain; Transcription factor, fungi	uncharacterized protein			-1.71067			no	FVEG_12838	FOXG_16856	FCIRG_08928T1	FGSG_03783	neha_12507
FFUJ_11516		0	Zn(2)-C6 fungal-type DNA-binding domain	uncharacterized protein			-1.96762			no	FVEG_13681	FOXG_00219	FCIRG_04010T1	FGSG_01172	neha_12834
FFUJ_11536		3	Transcription factor, fungi	related to nitrate assimilation regulatory protein nirA		-1.13862			-1.02655	yes	FVEG_10949	FOXG_12386	FCIRG_12057T1	FGSG_16284	neha_02697
FFUJ_11558		1	Zn(2)-C6 fungal-type DNA-binding domain	uncharacterized protein			1.16175			no	FVEG_08644	FOXG_12366	FCIRG_07532T1	FGSG_16278	neha_11288
FFUJ_11576		3	Transcription factor, fungi	uncharacterized protein	-1.94134	-4.20368	-2.12741		-2.74592	yes	FVEG_14159	FOXG_12195	FCIRG_09767T1	FGSG_16075	neha_11529
FFUJ_11604		1	Basic-leucine zipper (bZIP) transcription factor	uncharacterized protein		1.34879	1.86584		4.25889	unclear	FVEG_08633	FOXG_09852	FCIRG_09331T1	FGSG_02939	neha_07174
FFUJ_11621		4	Zn(2)-C6 fungal-type DNA-binding domain; Aflatoxin biosynthesis regulatory protein; Transcription factor, fungi	related to C6 transcription factor	-6.46929	-4.47951	-3.76602			unclear	FVEG_10783	FOXG_12341	FCIRG_03954T1	FGSG_16274	neha_09524
FFUJ_11638		1	Zn(2)-C6 fungal-type DNA-binding domain	uncharacterized protein	2.3588	2.99834	2.44025			yes	FVEG_10799	FOXG_12326	FCIRG_08991T1	FGSG_04502	neha_09899
FFUJ_11658		0	Zn(2)-C6 fungal-type DNA-binding domain; Transcription factor, fungi	uncharacterized protein	1.07631				-1.37632	no	FVEG_06129	FOXG_12130	FCIRG_01237T1	FGSG_16406	neha_03973
FFUJ_11668		1	Zn(2)-C6 fungal-type DNA-binding domain; Protein of unknown function DUF3468	uncharacterized protein	1.49951		-1.73002		-1.4344	no	FVEG_10827	FOXG_12298	FCIRG_02775T1	FGSG_03102	neha_09054
FFUJ_11716		2	Zn(2)-C6 fungal-type DNA-binding domain; Transcription factor, fungi	uncharacterized protein	-3.63706	-2.19737	-2.40524			unclear	FVEG_10876	FOXG_12250	FCIRG_00150T1	FGSG_16361	neha_05634
FFUJ_11719		0	Zn(2)-C6 fungal-type DNA-binding domain	uncharacterized protein	-3.12684	-4.27615	-1.4676		-1.81524	yes	FVEG_10878	FOXG_12248	FCIRG_00153T1	FGSG_16256	neha_02755
FFUJ_11778		8	Zn(2)-C6 fungal-type DNA-binding domain	related to cercosporin resistance protein	1.14383	-1.01915			-1.80831	yes	FVEG_10739	FOXG_07555	FCIRG_05343T1	FGSG_16345	neha_11410
FFUJ_11800		1	Zn(2)-C6 fungal-type DNA-binding domain; Transcription factor, fungi	related to positive activator of transcription		-2.30428			-1.71124	yes	FVEG_10720	FOXG_12146	FCIRG_06987T1	FGSG_16339	neha_00939
FFUJ_11808		0	Zn(2)-C6 fungal-type DNA-binding domain; Transcription factor, fungi	uncharacterized protein	-1.27379		-2.32815		-1.15651	no	FVEG_10711	FOXG_12138	FCIRG_06979T1	FGSG_01293	neha_05426
FFUJ_11819		6	Zinc finger, C2H2; Transcription factor, fungi; Zinc finger, C2H2-type/integrase, DNA-binding; Zinc finger, C2H2-like	related to regulatory protein amdA		-1.00893				yes	FVEG_10702	FOXG_12130	FCIRG_00008T1	FGSG_07504	neha_08651
FFUJ_11862		3	Zn(2)-C6 fungal-type DNA-binding domain; Aflatoxin biosynthesis regulatory protein	uncharacterized protein	1.73452		1.33307			no	FVEG_06046	FOXG_08626	FCIRG_10073T1	FGSG_17645	neha_07431
FFUJ_11894		4	Zn(2)-C6 fungal-type DNA-binding domain; Zinc finger, C2H2; Transcription factor, fungi; Zinc finger, C2H2-type/integrase, DNA-binding; Zinc finger, C2H2-like	uncharacterized protein	-1.72822		-1.42767			no	FVEG_10653	FOXG_12058	FCIRG_00846T1	FGSG_17423	neha_07548
FFUJ_11896		0	Zn(2)-C6 fungal-type DNA-binding domain; Transcription factor, fungi	related to pathway-specific regulatory protein			-1.30528			no	FVEG_10640	FOXG_12056	FCIRG_00850T1	FGSG_01795	neha_11569
FFUJ_11917		2	Zn(2)-C6 fungal-type DNA-binding domain	uncharacterized protein	-2.49579	-4.4088	-3.56974		-3.99397	yes	FVEG_10608	FOXG_12032	FCIRG_09062T1	FGSG_05682	neha_00113
FFUJ_11961		4	Basic-leucine zipper (bZIP) transcription factor; bZIP transcription factor, bZIP-1	uncharacterized protein					-1.29357	no	FVEG_10587	FOXG_11998	FCIRG_01023T1	FGSG_03040	neha_07174
FFUJ_11964		18	Zn(2)-C6 fungal-type DNA-binding domain	uncharacterized protein	-1.2496	-1.055	3.11671			unclear	FVEG_10572	FOXG_15408	FCIRG_01026T1	FGSG_03043	neha_14652
FFUJ_11969		4	Zn(2)-C6 fungal-type DNA-binding domain	uncharacterized protein	1.05389	1.40383				yes	FVEG_01650	FOXG_11991	FCIRG_08068T1	FGSG_03044	neha_06944
FFUJ_11995		3	Zinc finger, C2H2; Zinc finger, C2H2-like	uncharacterized protein	1.51409	4.01355				yes	FVEG_10561	FOXG_11976	FCIRG_06903T1	FGSG_17238	neha_15294
FFUJ_12002		6	Zn(2)-C6 fungal-type DNA-binding domain	uncharacterized protein		1.02067			-1.15679	yes	FVEG_03776	FOXG_05905	FCIRG_04856T1	FGSG_09328	neha_09736
FFUJ_12023		15	Zn(2)-C6 fungal-type DNA-binding domain	related to nitrate assimilation regulatory protein nirA			2.98802		-6.70535	no	FVEG_10532	FOXG_11952	FCIRG_07438T1	FGSG_16929	neha_08646
FFUJ_12033		4	Zn(2)-C6 fungal-type DNA-binding domain; Transcription factor, fungi	related to transcription activator protein acu-15			-1.54451		-3.4897	no	FVEG_10524	FOXG_11942	FCIRG_00868T1	FGSG_16321	neha_11210
FFUJ_12043		1	Zn(2)-C6 fungal-type DNA-binding domain; Transcription factor, fungi	related to transcriptional activator Mut3p	-1.54889		-3.33366		-3.39231	no	FVEG_06682	FOXG_10047	FCIRG_10778T1	FGSG_16308	neha_01733
FFUJ_12046		2	Transcription factor, fungi	uncharacterized protein			-2.82481		-4.57824	no	FVEG_08457	FOXG_10047	FCIRG_10778T1	FGSG_16308	neha_06427
FFUJ_12055		0	Zn(2)-C6 fungal-type DNA-binding domain	uncharacterized protein					-1.22446	no	FVEG_12844	FOXG_11936	FCIRG_00671T1	FGSG_16193	neha_14204
FFUJ_12060		1	Transcription factor, fungi	related to purine utilization positive regulator		-1.89965	-2.14535		-4.07992	unclear	FVEG_05913	FOXG_13278	FCIRG_04104T1	FGSG_12798	neha_09072
FFUJ_12084		6	Zn(2)-C6 fungal-type DNA-binding domain	uncharacterized protein	1.12635				-2.41085	no	FVEG_10505	FOXG_11899	FCIRG_11424T1	FGSG_17423	neha_07548
FFUJ_12098		1	Transcription factor, fungi	uncharacterized protein			-1.60959			no	FVEG_07767	FOXG_04667	FCIRG_04112T1	FGSG_09075	neha_15620
FFUJ_12130		0	Zn(2)-C6 fungal-type DNA-binding domain	uncharacterized protein	-1.31161		-2.09587		-1.41412	no	FVEG_07440	FOXG_04314	FCIRG_03077T1	FGSG_12048	neha_01560
FFUJ_12219		0	Transcription factor TFIIE, alpha subunit; Zinc finger, RING/FYVE/PHD-type; Transcription factor TFE/TFIIEalpha HTH domain; TFIIEalpha/SarR/Rpc3 HTH domain	related to transcription initiation factor IIE chain TFA1		1.00717				yes	FVEG_07351	FOXG_04231	FCIRG_12852T1	FGSG_01903	neha_01450
FFUJ_12262		1	Transcription factor, fungi	related to cutinase transcription factor 1 beta			-1.04856			no	FVEG_07311	FOXG_04196	FCIRG_04964T1	FGSG_01936	neha_14569
FFUJ_12415		3	Transcription factor Jun; Basic-leucine zipper (bZIP) transcription factor; bZIP transcription factor, bZIP-1	uncharacterized protein	-1.01665	-1.11868			1.04487	yes	FVEG_07160	FOXG_04043	FCIRG_06461T1	FGSG_07834	neha_07361
FFUJ_12430		1	Zn(2)-C6 fungal-type DNA-binding domain; Transcription factor, fungi	uncharacterized protein	-2.80044		-1.52594			no	FVEG_13978	FOXG_04024	FCIRG_12958T1	FGSG_16867	neha_13892
FFUJ_12439		2	Zn(2)-C6 fungal-type DNA-binding domain	uncharacterized protein	2.2139		-1.27761		-3.04268	no	FVEG_13970	FOXG_04032	FCIRG_08657T1	FGSG_16908	neha_07374
FFUJ_12448		0	Zn(2)-C6 fungal-type DNA-binding domain; Transcription factor, fungi	related to GAL4-like transcriptional activator			-2.23432		-1.91524	no	FVEG_13963	FOXG_04013	FCIRG_15092T1	FGSG_04786	neha_09287
FFUJ_12479		7	Zn(2)-C6 fungal-type DNA-binding domain	uncharacterized protein	-2.93396	-2.79258				yes	FVEG_12674	FOXG_15341	FCIRG_03676T1	FGSG_16855	neha_11332
FFUJ_12493		0	Zn(2)-C6 fungal-type DNA-binding domain; Zinc finger, C2H2; Transcription factor, fungi; Zinc finger, C2H2-type/integrase, DNA-binding; Zinc finger, C2H2-like	related to C2H2 transcription factor	-2.53563		-2.07376			no	FVEG_09421	FOXG_09141	FCIRG_14148T1	FGSG_17561	neha_09152
FFUJ_12506		1	Zn(2)-C6 fungal-type DNA-binding domain; Transcription factor, fungi	uncharacterized protein			-1.5506		-1.93736	no	FVEG_13916	FOXG_13486	FCIRG_11281T1	FGSG_16711	neha_07391
FFUJ_12513		6	Zn(2)-C6 fungal-type DNA-binding domain	uncharacterized protein	-7.50873	-5.57143	-1.3756			yes	FVEG_13258	FOXG_03806	FCIRG_11277T1	FGSG_02676	neha_00897
FFUJ_12519		0	Zn(2)-C6 fungal-type DNA-binding domain; Transcription factor, fungi	related to Put3p and to hypothetical protein YJL206c			-1.49755		-1.56638	no	FVEG_13907	FOXG_13496	FCIRG_15066T1	FGSG_10639	neha_02206
FFUJ_12528		8	Zn(2)-C6 fungal-type DNA-binding domain; Amino acid/polyamine transporter I; Amino acid permease domain	related to HNM1 - Choline permease	-1.64615	-1.55939			-1.31859	yes	FVEG_13901	FOXG_13504	FCIRG_09914T1	FGSG_11322	neha_15391
FFUJ_12536		2	Zn(2)-C6 fungal-type DNA-binding domain; Transcription factor, fungi	related to pathway-specific regulatory protein	-4.46894	-2.43972	-2.95966		-1.65973	unclear	FVEG_13893	FOXG_13513	FCIRG_15127T1	FGSG_01795	neha_11569
FFUJ_12583		2	Zinc finger, C2H2; Zinc finger, C2H2-like	uncharacterized protein	-5.1591				4.30937	no	FVEG_13852	FOXG_13563	FCIRG_07988T1	FGSG_09412	neha_03471
FFUJ_12592		0	Zn(2)-C6 fungal-type DNA-binding domain; Transcription factor, fungi	uncharacterized protein	-2.16503		-1.92473		1.23666	no	FVEG_13844	FOXG_13569	FCIRG_14613T1	FGSG_16548	neha_14254
FFUJ_12599		1	Zn(2)-C6 fungal-type DNA-binding domain	uncharacterized protein		2.23775			1.60254	yes	FVEG_13323	FOXG_14484	FCIRG_12815T1	FGSG_17741	neha_01793
FFUJ_12640		1	Zn(2)-C6 fungal-type DNA-binding domain; Transcription factor, fungi	uncharacterized protein	1.57848				-1.7503	no	FVEG_13362	FOXG_14518	FCIRG_00252T1	FGSG_16308	neha_11010
FFUJ_12646		3	Zn(2)-C6 fungal-type DNA-binding domain; Transcription factor, fungi	related to transcriptional activator Mut3p	-1.67393	-3.02738	-3.03766		-2.64202	unclear	FVEG_13367	FOXG_14525	FCIRG_00258T1	FGSG_17450	neha_06972
FFUJ_12670		0	Zn(2)-C6 fungal-type DNA-binding domain	uncharacterized protein			-1.0347			no	FVEG_13387	FOXG_04130	FCIRG_00287T1	FGSG_15995	neha_07297
FFUJ_12685		1	Zn(2)-C6 fungal-type DNA-binding domain; Transcription factor, fungi	uncharacterized protein	2.41597	2.61698	1.47852			yes	FVEG_13401	FOXG_10985	FCIRG_00301T1	FGSG_15877	neha_14757
FFUJ_12749		0	Zn(2)-C6 fungal-type DNA-binding domain; Transcription factor, fungi	related to cutinase transcription factor 1 beta	1.65557				-2.14824	no	FVEG_09891	FOXG_10877	FCIRG_03233T1	FGSG_15882	neha_14168
FFUJ_12762		2	Zn(2)-C6 fungal-type DNA-binding domain	uncharacterized protein	1.17975				-1.58317	no	FVEG_02219	FOXG_03347	FCIRG_01818T1	FGSG_13344	neha_08270
FFUJ_12803		5	Zn(2)-C6 fungal-type DNA-binding domain	uncharacterized protein	-6.25648	-4.33294	-1.8507		-1.1338	yes	FVEG_05929	FOXG_08737	FCIRG_01833T1	FGSG_01760	neha_07619
FFUJ_12814		3	Zn(2)-C6 fungal-type DNA-binding domain; Transcription factor, fungi	uncharacterized protein	-1.99617		-1.89234			no	FVEG_10711	FOXG_12138	FCIRG_06979T1	FGSG_01293	neha_05426
FFUJ_12839		3	Nucleoside phosphorylase domain; NB-ARC; Tetratricopeptide-like helical; Zinc finger, C2H2-like	related to ankyrin 3					-1.31097	no	FVEG_13503	FOXG_14688	FCIRG_07145T1	FGSG_17067	neha_10961
FFUJ_12938		8	Zn(2)-C6 fungal-type DNA-binding domain; Transcription factor, fungi	related to transcription activator protein acu-15	-3.01335	-3.95182			-2.02873	yes	FVEG_07766	FOXG_13278	FCIRG_04519T1	FGSG_12798	neha_02822
FFUJ_12947		6	Zn(2)-C6 fungal-type DNA-binding domain	related to C6 zink-finger protein PRO1A		-2.48346	-2.1068		-4.25165	unclear	FVEG_13579	FOXG_01108	FCIRG_08481T1	FGSG_17116	neha_07646
FFUJ_12956		3	Zn(2)-C6 fungal-type DNA-binding domain	uncharacterized protein	-3.31485	-3.54428			-1.04815	yes	FVEG_12674	FOXG_15341	FCIRG_03481T1	FGSG_16855	neha_05660
FFUJ_12964		0	Casein kinase II, regulatory subunit; Zn(2)-C6 fungal-type DNA-binding domain; Transcription factor, fungi	uncharacterized protein	-1.37756		-3.25319		-1.42299	no	FVEG_04416	FOXG_07488	FCIRG_03497T1	FGSG_06448	neha_07552
FFUJ_12972		0	Zn(2)-C6 fungal-type DNA-binding domain; Transcription factor, fungi	uncharacterized protein	1.36073		-1.16583		-1.72751	no	FVEG_04424	FOXG_02828	FCIRG_05796T1	FGSG_05827	neha_10816
FFUJ_13032		1	Zn(2)-C6 fungal-type DNA-binding domain	related to cercosporin resistance protein					1.35004	no	FVEG_04482	FOXG_07555	FCIRG_07718T1	FGSG_16561	neha_13747
FFUJ_13136		2	Zinc finger, C2H2; Zinc finger, C2H2-type/integrase, DNA-binding	related to regulatory protein amdA			-1.12281			no	FVEG_04572	FOXG_07647	FCIRG_04991T1	FGSG_17038	neha_13052
FFUJ_13139		0	Spo11/DNA topoisomerase VI, subunit A; Winged helix-turn-helix transcription repressor DNA-binding; Spo11/DNA topoisomerase VI, subunit A, N-terminal	related to meiotic recombination protein rec12			-1.08581			no	FVEG_04574	FOXG_07650	FCIRG_04993T1	FGSG_05949	neha_13637
FFUJ_13195		5	von Willebrand factor, type A; TFIIH C1-like, C-terminal; Zinc finger, C2H2; Ssl1-like; TFIIH basal transcription factor complex, subunit SSL1	related to transcription factor TFIIH chain p47		1.54519				yes	FVEG_04631	FOXG_07707	FCIRG_07493T1	FGSG_06002	neha_10113
FFUJ_13259		2	Zinc finger, C2H2; Zinc finger, C2H2-like	probable DNA polymerase epsilon, calytic chain POL2		1.46477				yes	FVEG_04701	FOXG_07774	FCIRG_05110T1	FGSG_16599	neha_10171
FFUJ_13327		2	Zinc finger, C2H2; Zinc finger, C2H2-type/integrase, DNA-binding; Zinc finger, C2H2-like	uncharacterized protein	-1.01771		-1.24567			no	FVEG_04764	FOXG_07844	FCIRG_11807T1	FGSG_12869	neha_13501
FFUJ_13348		0	Zn(2)-C6 fungal-type DNA-binding domain; Protein of unknown function DUF3468	related to acriflavine sensitivity control protein ACR-2			1.31565			no	FVEG_04788	FOXG_07866	FCIRG_11405T1	FGSG_16256	neha_13516
FFUJ_13386		2	High mobility group, HMG1/HMG2; High mobility group, superfamily	uncharacterized protein					1.41249	no	FVEG_04822	FOXG_07900	FCIRG_08005T1	FGSG_05151	neha_10064
FFUJ_13457		7	Transcription factor, fungi	uncharacterized protein		1.1648				yes	FVEG_04891	FOXG_07973	FCIRG_13080T1	FGSG_12703	neha_13552
FFUJ_13527		3	Bromodomain; Bromodomain transcription factor; Bromodomain, conserved site	related to transcription regulator SPT7			-1.23024			no	FVEG_04964	FOXG_08043	FCIRG_07750T1	FGSG_06291	neha_09993
FFUJ_13544		2	GCN5-related N-acetyltransferase (GNAT) domain; Zinc finger, H2C2-type, histone UAS binding; Acyl-CoA N-acyltransferase	probable SPT10 - transcription regulatory protein	1.51305	3.00173	1.19379			yes	FVEG_04981	FOXG_08059	FCIRG_02020T1	FGSG_06307	neha_09960
FFUJ_13548		1	Zinc finger, C2H2; Zinc finger, C2H2-type/integrase, DNA-binding; Zinc finger, C2H2-like	related to SWI5 - transcription factor			1.11278			no	FVEG_04985	FOXG_08063	FCIRG_02024T1	FGSG_06311	neha_09963
FFUJ_13618		0	Zn(2)-C6 fungal-type DNA-binding domain; Transcription factor, fungi	related to thiamine repressible genes regulatory protein thi1	1.45033	1.35921	3.33942		1.60055	unclear	FVEG_05057	FOXG_08134	FCIRG_07914T1	FGSG_16711	neha_09902
FFUJ_13620		2	Zn(2)-C6 fungal-type DNA-binding domain	related to negative acting factor	-1.72686	-2.65824	-1.69881			yes	FVEG_05060	FOXG_08137	FCIRG_05098T1	FGSG_06382	neha_09899
FFUJ_13627		1	Zn(2)-C6 fungal-type DNA-binding domain; Transcription factor, fungi	uncharacterized protein	2.29804		3.10848			no	FVEG_05067	FOXG_08144	FCIRG_05105T1	FGSG_03783	neha_09893
FFUJ_13632		0	SGT1	related to sgt1 protein			1.50148			no	FVEG_05072	FOXG_08149	FCIRG_08715T1	FGSG_09837	neha_09887
FFUJ_13653		1	Heat shock protein DnaJ, N-terminal; Heat shock protein DnaJ; Zinc finger, U1-type; Zinc finger, C2H2; Zinc finger, C2H2-type/integrase, DNA-binding; Zinc finger, C2H2-like; Heat shock protein DnaJ, conserved site; Zinc finger, double-stranded RNA binding	related to dnaJ-like proteins		3.24639				yes	FVEG_05095	FOXG_08169	FCIRG_09444T1	FGSG_09857	neha_09866
FFUJ_13679		8	Zinc finger, U1-type; Zinc finger, C2H2; Zinc finger, double-stranded RNA binding	related to BUD20 Protein involved in bud-site selection			1.1887			no	FVEG_12151	FOXG_03714	FCIRG_01034T1	FGSG_07952	neha_12021
FFUJ_13708		7	Zn(2)-C6 fungal-type DNA-binding domain; Transcription factor, fungi	related to pathway-specific regulatory protein nit-4		-2.93298			-1.19278	yes	FVEG_12118	FOXG_03745	FCIRG_06337T1	FGSG_16929	neha_15135
FFUJ_13711		0	Zn(2)-C6 fungal-type DNA-binding domain	uncharacterized protein			-1.08663			no	FVEG_12115	FOXG_03748	FCIRG_06341T1	FGSG_07924	neha_11780
FFUJ_13720		13	Zn(2)-C6 fungal-type DNA-binding domain	uncharacterized protein	-1.04628		-1.92059		-2.26999	no	FVEG_01650	FOXG_03754	FCIRG_00943T1	FGSG_16927	neha_02477
FFUJ_13806		0	Zn(2)-C6 fungal-type DNA-binding domain; Transcription factor, fungi	related to DAL81 - transcriptional activator for allantoin and GABA catabolic genes		-1.17429			-2.0957	yes	FVEG_07526	FOXG_04407	FCIRG_13833T1	FGSG_15926	neha_01671
FFUJ_13903		3	Zn(2)-C6 fungal-type DNA-binding domain	uncharacterized protein			-1.25362			no	FVEG_12844	FOXG_04498	FCIRG_00671T1	FGSG_08043	neha_14204
FFUJ_13963		3	Zn(2)-C6 fungal-type DNA-binding domain; Transcription factor, fungi	related to bikaverin cluster - transcription factor	-5.94695	-3.2157	1.55391		1.60007	unclear	FVEG_03382	FOXG_04753	FCIRG_01175T1	FGSG_17664	neha_12687
FFUJ_13994		0	Zn(2)-C6 fungal-type DNA-binding domain	related to C6 zink-finger protein PRO1A	1.53063	3.34076				yes	FVEG_00406	FOXG_01108	FCIRG_03601T1	FGSG_17116	neha_07159
FFUJ_14024		2	Zn(2)-C6 fungal-type DNA-binding domain; Glutathione S-transferase, C-terminal; Transcription factor, fungi; Glutathione S-transferase, C-terminal-like; Glutathione S-transferase/chloride channel, C-terminal	uncharacterized protein			-1.26158		-1.27904	no	FVEG_07645	FOXG_04571	FCIRG_12451T1	FGSG_08380	neha_07912
FFUJ_14039		3	Zn(2)-C6 fungal-type DNA-binding domain; Transcription factor, fungi	uncharacterized protein	-1.91748		-2.51293			no	FVEG_06759	FOXG_04592	FCIRG_12574T1	FGSG_01808	neha_02525
FFUJ_14054		2	Zn(2)-C6 fungal-type DNA-binding domain; Transcription factor, fungi	related to transcription activator protein acu-15					-4.68905	no	FVEG_08366	FOXG_04731	FCIRG_00515T1	FGSG_16321	neha_15265
FFUJ_14066		5	Zn(2)-C6 fungal-type DNA-binding domain; Transcription factor, fungi	uncharacterized protein	-1.13066		-1.26382			no	FVEG_12115	FOXG_03748	FCIRG_13685T1	FGSG_11672	neha_11780
FFUJ_14076		0	Transcription factor, fungi	uncharacterized protein	1.46026				-1.51185	no	FVEG_04891	FOXG_07973	FCIRG_08306T1	FGSG_17451	neha_01625
FFUJ_14087		0	Zn(2)-C6 fungal-type DNA-binding domain	uncharacterized protein			-1.07503		-1.331	no	FVEG_07755	FOXG_04653	FCIRG_01773T1	FGSG_00011	neha_11624
FFUJ_14116		3	Zn(2)-C6 fungal-type DNA-binding domain; Transcription factor, fungi	related to C6 transcription factor		2.01183	-2.02421		-2.21877	unclear	FVEG_04336	FOXG_04783	FCIRG_11933T1	FGSG_01936	neha_15095
FFUJ_14120		2	Transcription factor, fungi	probable cutinase transcription factor 1 beta	1.31976	1.17298			-2.49124	yes	FVEG_09360	FOXG_04669	FCIRG_11826T1	FGSG_07192	neha_12852
FFUJ_14136		4	Zinc finger, CCCH-type; Zinc finger, C6HC-type; Zinc finger, C2H2; Zinc finger, C3HC4 RING-type	related to ariadne-2 protein	-9.40717	-4.32035	-3.45527		3.31879	yes	FVEG_11914	FOXG_03967	FCIRG_02828T1	FGSG_07753	neha_06346
FFUJ_14215		2	Zn(2)-C6 fungal-type DNA-binding domain; Transcription factor, fungi	uncharacterized protein	-3.39292	-2.64346	-1.11561			yes	FVEG_14077	FOXG_10848	FCIRG_14024T1	FGSG_04803	neha_01690
FFUJ_14234		0	Zinc finger, C2H2; Zinc finger, C2H2-like	uncharacterized protein	1.18855	1.39824				yes	FVEG_00106	FOXG_11114	FCIRG_01858T1	FGSG_10569	neha_00711
FFUJ_14269		0	Transcription factor, fungi	related to Zn(II)Cys6 transcriptional activator					-1.90757	no	FVEG_09442	FOXG_10794	FCIRG_07637T1	FGSG_00052	neha_12508
FFUJ_14287		6	Casein kinase II, regulatory subunit; Zn(2)-C6 fungal-type DNA-binding domain; Transcription factor, fungi	uncharacterized protein			-1.25482			no	FVEG_02315	FOXG_10780	FCIRG_03497T1	FGSG_08380	neha_07912
FFUJ_14303		4	Zn(2)-C6 fungal-type DNA-binding domain	uncharacterized protein	-4.09909	-4.25875	-1.32993		-1.39225	yes	FVEG_03649	FOXG_10770	FCIRG_05132T1	FGSG_13652	neha_14338
FFUJ_14304		3	Zn(2)-C6 fungal-type DNA-binding domain	uncharacterized protein	-7.6313	-7.6766	-1.32432			yes	FVEG_00066	FOXG_08863	FCIRG_01490T1	FGSG_01760	neha_10774
FFUJ_14375		6	Zn(2)-C6 fungal-type DNA-binding domain	uncharacterized protein			-1.5825		-1.05109	no	FVEG_09363	FOXG_10703	FCIRG_08161T1	FGSG_00011	neha_06146
FFUJ_14383		0	Zn(2)-C6 fungal-type DNA-binding domain	uncharacterized protein	-1.32793	-1.15097			1.40287	yes	FVEG_09358	FOXG_10696	FCIRG_08155T1	FGSG_15987	neha_06088
FFUJ_14385		0	Transcription factor, fungi	probable cutinase transcription factor 1 beta			2.13741			no	FVEG_09360	FOXG_01610	FCIRG_11826T1	FGSG_07192	neha_12852
FFUJ_14387		8	Zn(2)-C6 fungal-type DNA-binding domain; Transcription factor, fungi	related to pathway-specific regulatory protein nit-4	-1.29206	-1.17028	-2.17196		-2.69522	unclear	FVEG_11865	FOXG_13435	FCIRG_00729T1	FGSG_16663	neha_08719
FFUJ_14391		8	Zn(2)-C6 fungal-type DNA-binding domain; Protein of unknown function DUF3468	uncharacterized protein	-2.93678	-4.11378			-2.75703	yes	FVEG_11861	FOXG_13431	FCIRG_00733T1	FGSG_12597	neha_09220
FFUJ_14504		3	Zn(2)-C6 fungal-type DNA-binding domain	uncharacterized protein			-2.41073			no	FVEG_00147	FOXG_03762	FCIRG_00934T1	FGSG_13246	neha_14290
FFUJ_14508		1	Homeodomain; Homeobox KN domain	uncharacterized protein			-1.38988			no	FVEG_12096	FOXG_08967	FCIRG_00930T1	FGSG_16926	neha_11814
FFUJ_14536		7	Zn(2)-C6 fungal-type DNA-binding domain; Transcription factor, fungi	related to transcriptional activator Mut3p	-1.04273		-1.20124			no	FVEG_12063	FOXG_03794	FCIRG_03510T1	FGSG_16922	neha_07250
FFUJ_14643		1	Transcription factor, fungi	uncharacterized protein	-2.94165	-3.39486	-3.77449			unclear	FVEG_04583	FOXG_03894	FCIRG_03310T1	FGSG_05958	neha_13651
FFUJ_14653		2	Zn(2)-C6 fungal-type DNA-binding domain	uncharacterized protein			-1.01753		-1.14019	no	FVEG_11968	FOXG_03903	FCIRG_03300T1	FGSG_02268	neha_02639
FFUJ_14673		4	Transcription factor, fungi	uncharacterized protein	-1.82968	-2.27728	-3.61404		-2.7905	unclear	FVEG_12027	FOXG_03921	FCIRG_11489T1	FGSG_00719	neha_02656
FFUJ_14720		0	Zn(2)-C6 fungal-type DNA-binding domain	uncharacterized protein	3.23414	2.73196				yes	FVEG_13179	FOXG_03971	FCIRG_06352T1	FGSG_06442	neha_00858
FFUJ_14740		0	Zn(2)-C6 fungal-type DNA-binding domain	uncharacterized protein	2.80438				-2.8516	no	FVEG_11892	FOXG_09508	FCIRG_05204T1	FGSG_11218	neha_01544
FFUJ_14748		0	Zn(2)-C6 fungal-type DNA-binding domain	uncharacterized protein			-2.30728		-1.5135	no	FVEG_11887	FOXG_03989	FCIRG_05197T1	FGSG_11356	neha_03922
FFUJ_14768		11	Zn(2)-C6 fungal-type DNA-binding domain	uncharacterized protein	1.01544				-2.78684	no	FVEG_11866	FOXG_09835	FCIRG_00728T1	FGSG_16278	neha_09090
FFUJ_14802		4	Zn(2)-C6 fungal-type DNA-binding domain; Transcription factor, fungi	uncharacterized protein	2.01889	1.4077			-1.23167	yes	FVEG_11830	FOXG_02462	FCIRG_14383T1	FGSG_06503	neha_06719
FFUJ_14818		4	Zn(2)-C6 fungal-type DNA-binding domain	related to ARG81 - transcription factor involved in arginine metabolism	-3.65717	-3.3885	-4.71201		-2.68707	unclear	FVEG_11819	FOXG_13384	FCIRG_01806T1	FGSG_11262	neha_11600
FFUJ_14821		2	Zn(2)-C6 fungal-type DNA-binding domain; Transcription factor, fungi	uncharacterized protein	2.71376				-2.89689	no	FVEG_13162	FOXG_15717	FCIRG_06152T1	FGSG_04901	neha_00124
FFUJ_14823		2	Zn(2)-C6 fungal-type DNA-binding domain; Transcription factor, fungi	uncharacterized protein	1.52781				-2.33348	no	FVEG_11815	FOXG_13379	FCIRG_01809T1	FGSG_17579	neha_08387
FFUJ_14855		8	Zn(2)-C6 fungal-type DNA-binding domain; Transcription factor, fungi	related to Zn(II)2Cys6 transcriptional activator			-1.17448		-1.07998	no	FVEG_12193	FOXG_13349	FCIRG_13464T1	FGSG_14003	neha_07364
FFUJ_14862		7	Zn(2)-C6 fungal-type DNA-binding domain	related to UPC2 - regulatory protein involved in control of sterol uptake					-1.14508	no	FVEG_11745	FOXG_12966	FCIRG_14196T1	FGSG_17584	neha_01241

## Sheet: b) Histone Modifying Enzymes
S4b Table Differentially regulated genes encoding predicted Histone Modifying Enzymes in wild type, ∆AREA and ∆AREB cultivated under limiting (6 mM GLN) and sufficient (60 mM GLN) nitrogen conditions.
Differential expression (Gene Expression Data) is depicted by log2 fold changes.
Histone Modifying Enzymes are classified by interpro domains.
Orthologs of closely related Fungi F. verticillioides (F.vert), F. oxysporum (F.oxy), F. circinatum (F.circi), F. graminearum (F.grami) and F. solani (F.solani) were determined by Simap.
Species Codes	F. verticillioides (F.vert), F. oxysporum (F.oxy), F. circinatum (F.circi), F. graminearum (F.grami), F. solani (F.solani)
Ortholog	Protein with highest identity in the respective organism
Experimental Conditions	WT 60 mM Gln vs. WT 6 mM Gln (WT_60mM-WT_6mM), ∆AREA 6 mM Gln vs. WT 6 mM Gln (AREA_6mM-WT_6mM), ∆AREB 6 mM Gln vs. WT 6 mM Gln (AREB_6mM-WT_6mM), ∆AREA 60 mM Gln vs. WT 60 mM Gln (AREA_60mM-WT_60mM) and ∆AREB 60 mM Gln vs. WT 60 mM Gln (AREB_60mM-WT_60mM)
Gene Expression Data	Foldchange between two experimental conditions in log2 scale
		Promoter			Gene Expression Data						Orthologs in closely related Fusarium species
Gene ID	Name	GATA pairs	Type	Annotation	WT_60mM-WT_6mM	AREA_6mM-WT_6mM	AREB_6mM-WT_6mM	AREA_60mM-WT_60mM	AREB_60mM-WT_60mM	AreA regulated?	F.vert	F.oxy	F.circi	F.grami	F.solani
FFUJ_00235		0	Acetyltransferase (GNAT-family)	uncharacterized protein		3.49775	1.33957		2.33919	yes	FVEG_00188	FOXG_01305	FCIRG_14318T1	FGSG_00174	neha_12740
FFUJ_00263		0	Acetyltransferase (GNAT-family)	uncharacterized protein	2.87556	3.23419	3.20882		1.98156	unclear	FVEG_00219	FOXG_01276	FCIRG_04567T1	FGSG_00117	neha_06186
FFUJ_00298		3	Acetyltransferase (GNAT-family)	related to acetyltransferase			2.29244			no	FVEG_00251	FOXG_01248	FCIRG_05967T1	FGSG_12819	neha_03085
FFUJ_00855		2	Methyltransferase	related to argonaute like post-transcriptional gene silencing protein QDE-2		3.6628			3.1015	yes	FVEG_00803	FOXG_00711	FCIRG_02532T1	FGSG_00348	neha_08089
FFUJ_00888		2	Acetyltransferase (GNAT-family)	uncharacterized protein		2.87242	1.06356		1.88429	yes	FVEG_00832	FOXG_00679	FCIRG_10452T1	FGSG_00377	neha_14184
FFUJ_02198		5	Acetyltransferase (GNAT-family)	uncharacterized protein	2.97573	1.45732	1.25097		-5.2164	unclear	FVEG_12593	FOXG_15279	FCIRG_11469T1	FGSG_07600	neha_11857
FFUJ_02294		0	Acetyltransferase (GNAT-family)	uncharacterized protein		1.18219				yes	FVEG_12685	FOXG_15358	FCIRG_01761T1	FGSG_07592	neha_07101
FFUJ_03393		8	Acetyltransferase (GNAT-family)	uncharacterized protein	1.62734	3.80376				yes	FVEG_05516	FOXG_02344	FCIRG_15144T1	FGSG_06609	neha_13807
FFUJ_03715		1	Acetyltransferase (GNAT-family)	related to acetyltransferase, GNAT family	-3.75686				2.04234	no	FVEG_13939	FOXG_05583	FCIRG_02598T1	FGSG_09723	neha_09484
FFUJ_03772		0	Acetyltransferase (GNAT-family)	uncharacterized protein		1.29993				yes	FVEG_12685	FOXG_10291	FCIRG_02579T1	FGSG_02754	neha_07101
FFUJ_04389		4	Acetyltransferase (GNAT-family)	uncharacterized protein	-2.54113		-1.84215			no	FVEG_04072	FOXG_06219	FCIRG_01405T1	FGSG_09523	neha_03585
FFUJ_04634		3	Acetyltransferase (GNAT-family)	uncharacterized protein	2.50932	4.98467	2.47494			yes	FVEG_06477	FOXG_08191	FCIRG_06680T1	FGSG_06329	neha_03704
FFUJ_04782		2	Acetyltransferase (GNAT-family)	uncharacterized protein	-2.67124	-3.04294				yes	FVEG_06330	FOXG_08343	FCIRG_09619T1	FGSG_09723	neha_03195
FFUJ_04971		3	Acetyltransferase (GNAT-family)	uncharacterized protein	1.26929	1.89749	1.41558			yes	FVEG_06139	FOXG_08533	FCIRG_09481T1	FGSG_06176	neha_03085
FFUJ_05245		2	Acetyltransferase (GNAT-family)	uncharacterized protein		3.38005			3.14481	yes	FVEG_05870	FOXG_08809	FCIRG_10441T1	FGSG_03195	neha_02695
FFUJ_05469		3	Acetyltransferase (GNAT-family)	related to acetyltransferase, GNAT family	1.37639	4.65851			2.29344	yes	FVEG_13211	FOXG_15745	FCIRG_02273T1	FGSG_12562	neha_08943
FFUJ_05494		9	Acetyltransferase (GNAT-family)	related to GNAT family acetyltransferase		3.32736	1.83179		3.34693	yes	FVEG_13186	FOXG_15693	FCIRG_07839T1	FGSG_12570	neha_08844
FFUJ_05768		7	Acetyltransferase (GNAT-family)	uncharacterized protein	1.69817	5.78888	1.58003		3.13836	yes	FVEG_05708	FOXG_03539	FCIRG_12355T1	FGSG_16962	neha_08382
FFUJ_05847		0	Acetyltransferase (GNAT-family)	uncharacterized protein	2.2115	5.11848	1.81807		1.59842	yes	FVEG_02333	FOXG_03464	FCIRG_13981T1	FGSG_17052	neha_07895
FFUJ_06164		4	Methyltransferase	related to cytosine C5-DNA methyltransferase	-1.55895				2.48363	no	FVEG_02018	FOXG_03151	FCIRG_09979T1	FGSG_08648	neha_08321
FFUJ_06436		1	Acetyltransferase (GNAT-family)	related to GNAT family acetyltransferase		-2.70269			2.6585	yes	FVEG_01748	FOXG_02878	FCIRG_06182T1	FGSG_05938	neha_14597
FFUJ_07518		4	Acetyltransferase (GNAT-family)	uncharacterized protein		3.23695			2.19731	yes	FVEG_02661	FOXG_05479	FCIRG_12727T1	FGSG_09944	neha_12216
FFUJ_08196		10	Acetyltransferase (GNAT-family)	related to GNAT family N-acetyltransferase	2.92906		2.63959		-1.13921	no	FVEG_08320	FOXG_12928	FCIRG_02552T1	FGSG_03149	neha_00992
FFUJ_08441	Dim-2	0	Methyltransferase	related to cytosine C5-DNA-methyltransferase			-1.24883			no	FVEG_11429	FOXG_12693	FCIRG_09171T1	FGSG_10766	neha_01269
FFUJ_08849		9	Acetyltransferase (GNAT-family)	uncharacterized protein		4.21042			1.91936	yes	FVEG_06767	FOXG_09167	FCIRG_02111T1	FGSG_04993	neha_02519
FFUJ_09057		2	Acetyltransferase (GNAT-family)	related to GNAT family N-acetyltransferase	-2.69848	3.39191			4.60014	yes	FVEG_06593	FOXG_08936	FCIRG_02956T1	FGSG_09067	neha_02286
FFUJ_09524		3	Acetyltransferase (GNAT-family)	uncharacterized protein		1.07005	1.24097		2.0359	unclear	FVEG_10268	FOXG_11554	FCIRG_04389T1	FGSG_04081	neha_01872
FFUJ_09669		3	Acetyltransferase (GNAT-family)	related to acetyltransferase		1.495			1.15455	yes	FVEG_10409	FOXG_11411	FCIRG_00741T1	FGSG_04218	neha_05512
FFUJ_10497		7	Acetyltransferase (GNAT-family)	uncharacterized protein	4.33671				-1.48533	no	FVEG_12685	FOXG_09551	FCIRG_00890T1	FGSG_03564	neha_11878
FFUJ_10921		0	Acetyltransferase (GNAT-family)	uncharacterized protein		1.07033			1.05229	yes	FVEG_08527	FOXG_09991	FCIRG_02391T1	FGSG_03239	neha_01950
FFUJ_11080		4	Acetyltransferase (GNAT-family)	probable histone acetyltransferase	1.23679	4.22345	2.02861		2.57556	yes	FVEG_00336	FOXG_01180	FCIRG_14314T1	FGSG_00280	neha_06557
FFUJ_11156		3	Acetyltransferase (GNAT-family)	related to GNAT family N-acetyltransferase	1.97606	5.32745	2.10638		3.00938	yes	FVEG_08320	FOXG_10192	FCIRG_11938T1	FGSG_03149	neha_00992
FFUJ_12132		3	Acetyltransferase (GNAT-family)	related to acetyltransferase		1.68808	1.21385		1.03129	yes	FVEG_07438	FOXG_04312	FCIRG_03075T1	FGSG_01985	neha_01905
FFUJ_12384		1	Acetyltransferase (GNAT-family)	related to N-acetyltransferase, GNAT family		1.94691	1.24084		1.55641	yes	FVEG_07193	FOXG_04080	FCIRG_10292T1	FGSG_07862	neha_07333
FFUJ_12478		0	Acetyltransferase (GNAT-family)	uncharacterized protein					-1.79065	no	FVEG_13939	FOXG_13460	FCIRG_03677T1	FGSG_09723	neha_11333
FFUJ_12555		1	Acetyltransferase (GNAT-family)	uncharacterized protein	1.49532	3.28949				yes	FVEG_13876	FOXG_13534	FCIRG_02578T1	FGSG_13988	neha_06843
FFUJ_12607		3	Acetyltransferase (GNAT-family)	related to GNAT family acetyltransferase	2.15784	4.72557	1.61857		1.57566	yes	FVEG_13331	FOXG_14491	FCIRG_10021T1	FGSG_13979	neha_14710
FFUJ_12667		4	Acetyltransferase (GNAT-family)	uncharacterized protein		2.62566			1.27321	yes	FVEG_02661	FOXG_14543	FCIRG_00282T1	FGSG_11501	neha_12216
FFUJ_13126		2	Acetyltransferase (GNAT-family)	uncharacterized protein	1.50946	2.10068				yes	FVEG_04562	FOXG_07637	FCIRG_10031T1	FGSG_05938	neha_13561
FFUJ_13544	SPT10	2	Acetyltransferase (GNAT-family)	probable SPT10 - transcription regulatory protein	1.51305	3.00173	1.19379			yes	FVEG_04981	FOXG_08059	FCIRG_02020T1	FGSG_06307	neha_09960
FFUJ_13566		1	Acetyltransferase (GNAT-family)	uncharacterized protein	1.40242	2.05048				yes	FVEG_04562	FOXG_08081	FCIRG_11022T1	FGSG_06329	neha_09956
FFUJ_13614		2	Acetyltransferase (GNAT-family)	probable MAK3 - N-acetyltransferase		1.36552				yes	FVEG_05052	FOXG_08129	FCIRG_07918T1	FGSG_06376	neha_09906
FFUJ_14620		12	Acetyltransferase (GNAT-family)	probable glucosamine-phosphate N-acetyltransferase	-3.059	-2.34086				yes	FVEG_11990	FOXG_03874	FCIRG_00958T1	FGSG_04543	neha_08580
FFUJ_14769		5	Acetyltransferase (GNAT-family)	related to acetyltransferase		10.2185	5.08287		8.45877	yes	FVEG_10409	FOXG_13422	FCIRG_00741T1	FGSG_11317	neha_06108
